# A flexible pipeline combining clustering and correction tools for prokaryotic and eukaryotic metabarcoding

Short title:

A flexible metabarcoding pipeline based on read correction

Miriam I. Brandt<sup>1</sup>, Blandine Trouche<sup>2</sup>, Laure Quintric<sup>3</sup>, Patrick Wincker<sup>4,5</sup>, Julie Poulain<sup>4,5</sup>, and Sophie Arnaud-Haond<sup>1</sup>

<sup>1</sup>MARBEC, Ifremer, Univ. Montpellier, IRD, CNRS, Sète, France

<sup>2</sup> Univ. Brest, CNRS, Ifremer, Laboratoire de Microbiologie des Environnements Extrêmes, Plouzané, France

<sup>3</sup>Ifremer, Cellule Bioinformatique, Brest, France

<sup>4</sup> Génomique Métabolique, Génoscope, Institut François Jacob, CEA, CNRS, Univ. Evry, Université Paris-Saclay, 91057 Evry, France

<sup>5</sup> Research Federation for the study of Global Ocean Systems Ecology and Evolution, FR2022/ Tara

Corresponding author: [sarnaud@ifremer.fr](mailto:sarnaud@ifremer.fr), [miriam.isabelle.brandt@gmail.com](mailto:miriam.isabelle.brandt@gmail.com),

## ABSTRACT

1 Environmental metabarcoding is an increasingly popular tool for studying biodiversity in  
2 marine and terrestrial biomes. With sequencing costs decreasing, multiple-marker metabarcoding,  
3 spanning several branches of the tree of life, is becoming more accessible. However, bioinformatic  
4 approaches need to adjust to the diversity of taxonomic compartments targeted as well as to each  
5 barcode gene specificities. We built and tested a pipeline based on Illumina read correction with  
6 DADA2 allowing analysing metabarcoding data from prokaryotic (16S) and eukaryotic (18S, COI)  
7 life compartments. We implemented the option to cluster Amplicon Sequence Variants (ASVs)  
8 into Operational Taxonomic Units (OTUs) with swarm v2, a network-based clustering algorithm,  
9 and to further curate the ASVs/OTUs based on sequence similarity and co-occurrence rates using  
10 a recently developed algorithm, LULU. Finally, flexible taxonomic assignment was implemented  
11 *via* Ribosomal Database Project (RDP) Bayesian classifier and BLAST. We validate this pipeline  
12 with ribosomal and mitochondrial markers using eukaryotic mock communities and 42 deep-sea  
13 sediment samples. The results show that ASVs, reflecting genetic diversity, may not be appropriate  
14 for alpha diversity estimation of organisms fitting the biological species concept. The results  
15 underline the advantages of clustering and LULU-curation for producing more reliable metazoan  
16 biodiversity inventories, and show that LULU is an effective tool for filtering metazoan molecular  
17 clusters, although the minimum identity threshold applied to co-occurring OTUs has to be  
18 increased for 18S. The comparison of BLAST and the RDP Classifier underlined the potential of  
19 the latter to deliver very good assignments, but highlighted the need for a concerted effort to build  
20 comprehensive, ecosystem-specific, databases adapted to the studied communities.

21

22

23           Key words: Biodiversity, bioinformatics, environmental DNA, metabarcoding, mock  
24 communities, eukaryotes (18S and COI), prokaryotes (16S)  
25

## 26 INTRODUCTION

27 High-throughput sequencing (HTS) technologies are revolutionizing the way we assess  
28 biodiversity. By producing millions of DNA sequences per sample, HTS allows broad taxonomic  
29 biodiversity surveys through metabarcoding of bulk DNA from complex communities or from  
30 environmental DNA (eDNA) directly extracted from soil, water, and air samples. First developed  
31 to unravel cryptic and uncultured prokaryotic diversity, metabarcoding methods have been  
32 extended to eukaryotes as powerful, non-invasive tools, allowing detection of a wide range of taxa  
33 in a rapid, cost-effective way using a variety of sample types (Valentini et al. 2009; Taberlet et al.  
34 2012; Creer et al. 2016; Stat et al. 2017). In the last decade, these tools have been used to describe  
35 past and present biodiversity in terrestrial (Ji et al. 2013; Yoccoz et al. 2012; Yu et al. 2012; Slon  
36 et al. 2017; Pansu et al. 2015), freshwater (Valentini et al. 2016; Deiner et al. 2016; Bista et al.  
37 2015; Dejean et al. 2011; Evans et al. 2016), and marine (Fonseca et al. 2010; Sinniger et al. 2016;  
38 Pawlowski et al. 2011; Massana et al. 2015; De Vargas et al. 2015; Salazar et al. 2016; Boussarie  
39 et al. 2018; Bik et al. 2012) environments.

40 As every new technique brings on new challenges, a number of studies have put  
41 considerable effort into delineating critical aspects of metabarcoding protocols to ensure robust and  
42 reproducible results (see Fig.1 in Fonseca et al, 2018). Recent studies have addressed many issues  
43 regarding sampling methods (Dickie et al. 2018), contamination risks (Goldberg et al. 2016), DNA  
44 extraction protocols (Brannock and Halanych 2015; Deiner et al. 2015; Zinger et al. 2016),  
45 amplification biases and required PCR replication levels (Nichols et al. 2018; Alberdi et al. 2017;  
46 Ficetola et al. 2015). Similarly, computational pipelines, through which molecular data are  
47 transformed into ecological inventories of putative taxa, have also been in constant improvement.  
48 PCR-generated errors and sequencing errors are major bioinformatic challenges for metabarcoding  
49 pipelines, as they can strongly bias biodiversity estimates (Coissac et al. 2012; Bokulich et al.

50 2013). A variety of tools have thus been developed for quality-filtering amplicon data to remove  
51 erroneous reads and improve the reliability of Illumina-sequenced metabarcoding inventories  
52 (Bokulich et al. 2013; Eren et al. 2013; Minoche et al. 2011). Studies that evaluated bioinformatic  
53 processing steps have generally found that sequence quality-filtering parameters and clustering  
54 thresholds most strongly affect molecular biodiversity inventories, resulting in considerable  
55 variation during data analysis (Brannock and Halanych 2015; Clare et al. 2016; Brown et al. 2015;  
56 Xiong and Zhan 2018).

57         There were historically two main reasons for clustering sequences into Operational  
58 Taxonomic Units (OTUs). The first was to limit the bias due to PCR and sequencing errors (and  
59 to some extent intra-individual variability linked to the existence of pseudogenes) by clustering  
60 erroneous sequences with error-free target sequences. The second was to delineate OTUs as  
61 clusters of homologous sequences (by grouping the alleles/haplotype at the same locus) that  
62 would best fit a “species level”, i.e. the Operational Taxonomic Units defined using a classical  
63 phenetic *proxy* (Sokal and Crovello 1970). Recent bioinformatic algorithms alleviate the  
64 influence of errors and intraspecific variability in metabarcoding datasets. First, amplicon-  
65 specific error correction methods, commonly used to correct sequences produced by  
66 pyrosequencing (Coissac et al. 2012), have now become available for Illumina-sequenced data.  
67 Introduced in 2016, DADA2 effectively corrects Illumina sequencing errors and has quickly  
68 become a widely used tool, particularly in the microbial world, producing more accurate  
69 biodiversity inventories and resolving fine-scale genetic variation by defining Amplicon  
70 Sequence Variants (ASVs) (Callahan et al. 2016; Nearing et al. 2018). Second, LULU is a  
71 recently developed curation algorithm designed to filter out spurious clusters, originating from  
72 PCR and sequencing errors, or intra-individual variability (pseudogenes, heteroplasmy), based on  
73 their similarity and co-occurrence rate with more abundant clusters, allowing obtaining curated

74 datasets while avoiding arbitrary abundance filters (Frøslev et al. 2017). The authors validated  
75 their approach on metabarcoding of plants using ITS2 (nuclear ribosomal internal transcribed  
76 spacer region 2) and evaluated it on several pipelines. Their results show that ASV definition  
77 with DADA2, subsequent clustering to address intraspecific variation, and final curation with  
78 LULU is the safest pathway for producing reliable and accurate metabarcoding data. The authors  
79 concluded that their validation on plants is relevant to other organism groups and other markers,  
80 while recommending future validation of LULU on mock communities as LULU's minimum  
81 match parameter may need to be adjusted to less variable marker genes.

82         The impact of errors being strongly decreased by correction algorithms such as DADA2  
83 and LULU, the relevance of clustering sequences into OTUs is now being debated. Indeed, after  
84 presenting their new algorithm on prokaryotic communities, the authors of DADA2 proposed that  
85 the reproducibility and comparability of ASVs across studies challenge the need for clustering  
86 sequences, as OTUs have the disadvantage of being study-specific and defined using arbitrary  
87 thresholds (Callahan et al. 2017). However, clustering sequences may still be necessary in  
88 metazoan datasets, where very distinct levels of intraspecific polymorphism can exist in the same  
89 gene region among taxa due to both evolutionary and biological specificity (Bucklin et al. 2011;  
90 Phillips et al. 2019). ASV-based inventories will thus be biased in favour of taxa with high levels  
91 of intraspecific diversity, even though the latter are not necessarily the most abundant ones (Bazin  
92 et al. 2006). Such bias in biodiversity inventories based on ASVs is likely to be magnified in  
93 presence-absence metabarcoding datasets, commonly used for metazoan communities (Ji et al.  
94 2013). Similarly, imposing a “universal” clustering threshold on metabarcoding datasets is also  
95 introducing bias, penalizing groups with lower interspecific divergence, and overestimating species  
96 diversity in groups with higher interspecific divergence. However, this can be alleviated with tools  
97 such as swarm v2, a single-linkage clustering algorithm (Mahe et al. 2015). Based on network

98 theory, swarm v2 aggregates sequences iteratively and locally around seed sequences and  
99 determines coherent groups of sequences, independent of amplicon input order, allowing highly  
100 scalable and fine-scale clustering. Finally, it is widely recognized that homogeneous entities  
101 sharing a set of evolutionary and ecological properties, i.e. *species* (Mayr 1942; de Queiroz 2005),  
102 sometimes referred to “ecotypes” for prokaryotes (Cohan 2001; Gevers et al. 2005), represent a  
103 fundamental category of biological organization that is the cornerstone of most ecological and  
104 evolutionary theories and empirical studies. Maintaining ASV information for feeding databases  
105 and cross-comparing studies is not incompatible with their clustering into OTUs, and this choice  
106 depends on the purpose of the study, i.e. providing a census of the extent and distribution of genetic  
107 polymorphism for a given gene, or a census of biodiversity to be used and manipulated in  
108 ecological or evolutionary studies.

109         Here we evaluate DADA2 and LULU, using them alone and in combination with swarm  
110 v2, to assess the performance of these new tools for metabarcoding of metazoan communities.  
111 Using both mitochondrial COI (Leray et al. 2013) and the V1-V2 region of 18S ribosomal RNA  
112 (rRNA) (Sinniger et al. 2016), we evaluated the need for clustering and the effectiveness of LULU  
113 curation to select pipeline parameters delivering the most accurate resolution of two deep-sea mock  
114 communities. We then test the different bioinformatic tools on a deep-sea sediment dataset in order  
115 to select an optimal trade-off between inflating biodiversity estimates and losing rare biodiversity.  
116 As a baseline for comparison, and in the perspective of the joint study of metazoan and microbial  
117 taxa, we also analysed the 16S V4-V5 rRNA barcode on these natural samples (Parada et al. 2016).

118         Our objectives were to (1) discuss the use of ASV vs OTU-centred datasets depending on  
119 taxonomic compartment and study objectives, and (2) determine the most adequate swarm-  
120 clustering and LULU curation thresholds that avoid inflating biodiversity estimates while retaining  
121 rare biodiversity.

122

## 123 **1 MATERIALS AND METHODS**

### 124 **1.1 Preparation of samples**

#### 125 *Mock communities*

126 Genomic-DNA mass-balanced metazoan mock communities (5 ng/μL) were prepared  
127 using standardized 10 ng/μL DNA extracts of ten deep-sea specimens belonging to five taxonomic  
128 groups (Polychaeta, Crustacea, Anthozoa, Bivalvia, Gastropoda; Table S1). Specimen DNA was  
129 extracted using a CTAB extraction protocol, from muscle tissue or from whole polyps in the case  
130 of cnidarians. The mock communities differed in terms of ratios of total genomic DNA from each  
131 species, with increased dominance of three species and secondary species DNA input decreasing  
132 from 3% to 0.7%. We individually barcoded the species present in the mock communities: PCRs  
133 of both target genes were performed using the same primers as the ones used in metabarcoding (see  
134 below). The PCR reactions (25 μL final volume) contained 2 μL DNA template with 0.5 μM  
135 concentration of each primer, 1X *Phusion* Master Mix, and an additional 1 mM MgCl<sub>2</sub> for COI.  
136 PCR amplifications (98 °C for 30 s; 40 cycles of 10 s at 98 °C, 45 s at 48 °C (COI) or 57 °C (18S),  
137 30 s at 72 °C; and 72 °C for 5 min) were cleaned up with ExoSAP (Thermo Fisher Scientific,  
138 Waltham, MA, USA) and sent to Eurofins (Eurofins Scientific, Luxembourg) for Sanger  
139 sequencing. The barcode sequences obtained for all mock specimens were added to the databases  
140 used for taxonomic assignments of metabarcoding datasets, and were submitted on Genbank under  
141 accession numbers MN826120-MN826130 and MN844176-MN844185.

142

#### 143 *Environmental DNA*

144 Sediment cores were collected from thirteen deep-sea sites ranging from the Arctic to the  
145 Mediterranean during various cruises (Table S2). Sampling was carried out with a multicorer or



146 with a remotely operated vehicle. Three tube cores were taken at each sampling station (GPS  
147 coordinates in Table S2). The latter were sliced into depth layers that were transferred into zip-lock  
148 bags, homogenised, and frozen at  $-80^{\circ}\text{C}$  on board before being shipped on dry ice to the laboratory.  
149 The first layer (0-1 cm) was used in the present study. DNA extractions were performed using  
150 approximately 10 g of sediment with the PowerMax Soil DNA Isolation Kit (Qiagen, Hilden,  
151 Germany). To increase the DNA yield, the elution buffer was left on the spin filter membrane for  
152 10 min at room temperature before centrifugation. The  $\sim 5$  mL extract was then split into three parts,  
153 one of which was kept in screw-cap tubes for archiving purposes and stored at  $-80^{\circ}\text{C}$ . For the four  
154 field controls, the first solution of the kit was poured into the control zip-lock bag, before following  
155 the usual extraction steps. For the two negative extraction controls, a blank extraction (adding  
156 nothing to the bead tube) was performed alongside sample extractions.

157

## 158 **1.2 Amplicon library construction and high-throughput sequencing**

159 Two primer pairs were used to amplify the mitochondrial COI and the 18S V1-V2 rRNA  
160 barcode genes specifically targeting metazoans, and one pair of primer was used to amplify the  
161 prokaryote 16S V4-V5 region. PCR amplifications, library preparation, and sequencing were  
162 carried out at Genoscope (Evry, France) as part of the eDNAbyss project.

163

### 164 *Eukaryotic 18S V1-V2 rRNA gene amplicon generation*

165 Amplifications were performed with the *Phusion* High Fidelity PCR Master Mix with GC  
166 buffer (Thermo Fisher Scientific, Waltham, MA, USA) and the SSUF04 (5'-  
167 GCTTGTCTCAAAGATTAAGCC-3') and SSUR22<sub>mod</sub> (5'- CCTGCTGCCTTCCTTRGA-3')  
168 primers (Sinniger et al. 2016), preferentially targeting metazoans, the primary focus of this study.  
169 The PCR reactions (25  $\mu\text{L}$  final volume) contained 2.5 ng or less of DNA template with 0.4  $\mu\text{M}$

170 concentration of each primer, 3% of DMSO, and 1X *Phusion* Master Mix. PCR amplifications  
171 (98 °C for 30 s; 25 cycles of 10 s at 98 °C, 30 s at 45 °C, 30 s at 72 °C; and 72 °C for 10 min) of all  
172 samples were carried out in triplicate in order to smooth the intra-sample variance while obtaining  
173 sufficient amounts of amplicons for Illumina sequencing.

174

#### 175 *Eukaryotic COI gene amplicon generation*

176 Metazoan COI barcodes were generated using the mlCOIintF (5'-  
177 GGWACWGGWTGAACWGTWTAYCCYCC-3') and jgHCO2198 (5'-  
178 TAIACYTCIGGRTGICCRARAAYCA-3') primers (Leray et al. 2013). Triplicate PCR  
179 reactions (20 µl final volume) contained 2.5 ng or less of total DNA template with 0.5 µM final  
180 concentration of each primer, 3% of DMSO, 0.175 mM final concentration of dNTPs, and 1X  
181 Advantage 2 Polymerase Mix (Takara Bio, Kusatsu, Japan). Cycling conditions included a 10 min  
182 denaturation step followed by 16 cycles of 95 °C for 10 s, 30s at 62°C (-1°C per cycle), 68 °C for  
183 60 s, followed by 15 cycles of 95 °C for 10 s, 30s at 46°C, 68 °C for 60 s and a final extension of  
184 68 °C for 7 min.

#### 185 *Prokaryotic 16S rRNA gene amplicon generation*

186 Prokaryotic barcodes were generated using 515F-Y (5'- GTGYCAGCMGCCGCGGTAA-  
187 3') and 926R (5'- CCGYCAATTYMTTTRAGTTT-3') 16S-V4V5 primers (Parada et al. 2016).  
188 Triplicate PCR mixtures were prepared as described above for 18S-V1V2, but cycling conditions  
189 included a 30 s denaturation step followed by 25 cycles of 98 °C for 10 s, 53 °C for 30 s, 72 °C for  
190 30 s, and a final extension of 72 °C for 10 min.

191

192

193 *Amplicon library preparation*

194 PCR triplicates were pooled and PCR products purified using 1X AMPure XP beads  
195 (Beckman Coulter, Brea, CA, USA) clean up. Aliquots of purified amplicons were run on an  
196 Agilent Bioanalyzer using the DNA High Sensitivity LabChip kit (Agilent Technologies, Santa  
197 Clara, CA, USA) to check their lengths and quantified with a Qubit fluorimeter (Invitrogen,  
198 Carlsbad, CA, USA). One hundred nanograms of pooled amplicon triplicates were directly end-  
199 repaired, A-tailed and ligated to Illumina adapters on a Biomek FX Laboratory Automation  
200 Workstation (Beckman Coulter, Brea, CA, USA). Library amplification was performed using a  
201 Kapa HiFi HotStart NGS library Amplification kit (Kapa Biosystems, Wilmington, MA, USA) with  
202 the same cycling conditions applied for all metagenomic libraries and purified using 1X AMPure  
203 XP beads.

204

205 *Sequencing library quality control*

206 Amplicon libraries were quantified by Quant-iT dsDNA HS assay kits using a Fluoroskan  
207 Ascent microplate fluorometer (Thermo Fisher Scientific, Waltham, MA, USA) and then by qPCR  
208 with the KAPA Library Quantification Kit for Illumina Libraries (Kapa Biosystems, Wilmington,  
209 MA, USA) on an MxPro instrument (Agilent Technologies, Santa Clara, CA, USA). Library  
210 profiles were assessed using a high-throughput microfluidic capillary electrophoresis system  
211 (LabChip GX, Perkin Elmer, Waltham, MA, USA).

212

213 *Sequencing procedures*

214 Library concentrations were normalized to 10 nM by addition of 10 mM Tris-Cl (pH 8.5)  
215 and applied to cluster generation according to the Illumina Cbot User Guide (Part # 15006165).  
216 Amplicon libraries are characterized by low diversity sequences at the beginning of the reads due

217 to the presence of the primer sequence. Low-diversity libraries can interfere in correct cluster  
218 identification, resulting in a drastic loss of data output. Therefore, loading concentrations of  
219 libraries were decreased (8–9 pM instead of 12–14 pM for standard libraries) and PhiX DNA spike-  
220 in was increased (20% instead of 1%) in order to minimize the impacts on the run quality.  
221 Libraries were sequenced on HiSeq2500 (System User Guide Part # 15035786) instruments  
222 (Illumina, San Diego, CA, USA) in a 250 bp paired-end mode.

223

### 224 **1.3 Bioinformatic analyses**

225 All bioinformatic analyses were performed using a Unix shell script on a home-based  
226 cluster (DATARMOR, Ifremer), available on Gitlab (<https://gitlab.ifremer.fr/abyss-project/>). The  
227 mock communities were analysed alongside the natural samples, and used to validate the  
228 metabarcoding pipeline in terms of detection of correct species and presence of false-positives. The  
229 details of the pipeline, along with specific parameters used for all three metabarcoding markers are  
230 listed in Table S3.

231

#### 232 *Reads preprocessing*

233 Our multiplexing strategy relies on ligation of adapters to amplicon pools, meaning that  
234 contrary to libraries produced by double PCR, the reads in each paired sequencing run can be  
235 forward or reverse. DADA2 correction is based on error distribution differing between R1 and R2  
236 reads. We thus developed a custom script (*abyss-preprocessing* in *abyss-pipeline*) allowing  
237 separating forward and reverse reads in each paired run and reformatting the outputs to be  
238 compatible with DADA2. Briefly, the script uses cutadapt v1.18 to detect and remove primers,  
239 while separating forward and reverse reads in each paired sequence file to produce two pairs of  
240 sequence files per sample named R1F/R2R and R2F/R1R. Cutadapt parameters (Table S3) were

241 set to require an overlap over the full length of the primer (default: 3 nt), with 2-4 nt mismatches  
242 allowed for ribosomal loci, and 7 nt mismatches allowed for COI (default: 10%). Each identified  
243 forward and reverse read is then renamed with the correct extension (/1 and /2 respectively),  
244 which is a requirement for DADA2 to recognize the pairs of reads. Each pair of renamed sequence  
245 files is then re-paired with BBMAP Repair v38.22 in order to remove singleton reads (non-paired  
246 reads). Optionally, sequence file names can also be renamed if necessary using a CSV  
247 correspondence file.

248

#### 249 *Read correction, amplicon cluster generation and taxonomic assignment*

250 Pairs of Illumina reads were corrected with DADA2 v.1.10 (Callahan et al. 2016) following  
251 the online tutorial for paired-end HiSeq data  
252 ([https://benjjneb.github.io/dada2/bigdata\\_paired.html](https://benjjneb.github.io/dada2/bigdata_paired.html)). Reads were filtered and trimmed with the  
253 *filterAndTrim* function and all reads containing ambiguous bases removed. The parameters were  
254 set based on tutorial recommendations and trimming lengths were adjusted based on sequence  
255 quality profiles, so that Q-scores remained above 30 (truncLen at 220 for 18S and 16S, 200 for  
256 COI, maxEE at 2, truncQ at 11, maxN at 0).

257 The error model was calculated for forward and reverse reads (R1F/R2R pairs and then  
258 R2F/R1R pairs) with *learnErrors* based on 100 million randomly chosen bases (default), and reads  
259 were dereplicated using *derepFastq*. After read correction with the *dada* function, forward and  
260 reverse reads were merged with a minimum overlap of 12 nucleotides, allowing no mismatches  
261 (default). The amplicons were then filtered by size. The size range was set to 330-390 bp for the  
262 18S SSU rRNA marker gene, 300-326 bp for the COI marker gene, and 350-390 bp for the 16S  
263 rRNA marker gene.

264           Chimeras were removed with *removeBimeraDenovo* and ASVs were taxonomically  
265 assigned via the RDP naïve Bayesian classifier method, the default assignment method  
266 implemented in DADA2. A second taxonomic assignment method was optionally implemented in  
267 the pipeline, allowing assigning ASVs using BLAST+ (Basic Local Alignment Search Tool v2.6.0)  
268 based on minimum similarity and minimum coverage (`-perc_identity 70` and `-qcov_hsp 80`). An  
269 initial test implementing BLASTn+ to assign taxonomy only to the COI dataset using a 96%  
270 percent identity threshold led to the exclusion of the majority of the clusters. Given observed inter-  
271 specific mitochondrial DNA divergence levels of up to 30% within a same polychaete genus (Zanol  
272 et al. 2010) or among some closely related deep-sea shrimp species (Shank et al. 1999), and  
273 considering our interest in the identities of multiple, largely unknown taxa in poorly characterized  
274 communities, more stringent BLAST thresholds were not implemented at this stage. The Silva132  
275 reference database was used for the 16S and 18S SSU rRNA marker genes (Quast et al. 2012), and  
276 MIDORI-UNIQUE (Machida et al. 2017) was used for COI. The databases were downloaded from  
277 the DADA2 website (<https://benjjneb.github.io/dada2/training.html>) and from the FROGS website  
278 ([http://genoweb.toulouse.inra.fr/frogs\\_databanks/assignation/](http://genoweb.toulouse.inra.fr/frogs_databanks/assignation/)). Finally, to evaluate the effect of  
279 clustering, ASV tables produced by DADA2 were clustered with *swarm* v2 (Mahe et al. 2015) at  
280  $d=1,3,4,5$  and  $11$  for 18S and 16S, and  $d=1,5,6,7$ , and  $13$  for COI in FROGS  
281 (<http://frogs.toulouse.inra.fr/>) (Escudié et al. 2018). Resulting OTUs were taxonomically assigned  
282 via RDP and BLAST+ using the databases stated above.

283           Molecular clusters were refined in R v.3.5.1 (R Core Team 2018). A blank correction was  
284 made using the *decontam* package v.1.2.1 (Davis et al. 2018), removing all clusters that were  
285 prevalent (more frequent) in negative control samples. ASV/OTU tables were refined  
286 taxonomically based on their RDP or BLAST taxonomy. For both assignment methods, unassigned  
287 clusters were removed. Non-target 18S and COI clusters (bacterial, non-metazoan) as well as all

288 clusters with a terrestrial assignment (taxonomic groups known to be terrestrial-only, such as  
289 Insecta, Arachnida, Diplopoda, Amphibia, terrestrial mammals, Stylommatophora, Aves,  
290 Onychophora, Succineidae, Cyclophoridae, Diplommatinidae, Megalomastomatidae, Pupinidae,  
291 Veronicellidae) were removed. Samples were checked to ensure that a minimum of 10,000  
292 metazoan reads were left after refining. Finally, as tag-switching is always to be expected in  
293 multiplexed metabarcoding analyses (Schnell et al. 2015), an abundance renormalization was  
294 performed to remove spurious positive results due to reads assigned to the wrong sample  
295 (Wangensteen and Turon 2016, script from  
296 [https://github.com/metabarpark/R\\_scripts\\_metabarpark](https://github.com/metabarpark/R_scripts_metabarpark)).

297 To test LULU curation (Frøslev et al. 2017), refined 18S and COI ASVs/OTUs were  
298 curated with LULU v.0.1 following the online tutorial (<https://github.com/tobiasgf/lulu>). The  
299 LULU algorithm detects erroneous clusters by comparing their sequence similarities and co-  
300 occurrence rate with more abundant (“parent”) clusters. LULU was tested with a minimum relative  
301 co-occurrence of 0.90, using a minimum similarity threshold (*minimum match*) at 84% (default)  
302 and slightly higher at 90%, following recommendations of the authors for less variable loci than  
303 ITS.

304 The vast majority of prokaryotes usually show low levels (< 1% divergence) of intra  
305 genomic variability for the 16S SSU rRNA gene (Acinas et al. 2004; Pei et al. 2010). These low  
306 intragenomic divergence levels can be efficiently removed with swarm clustering at  $d=1$ . Although  
307 LULU curation may still be useful to merge redundant phylotypes in specific cases such as  
308 haplotype network analyses, this was not tested in this study. Indeed, parallelization not being  
309 currently available for LULU curation, the richness of prokaryote communities implied an  
310 unrealistic calculation time, even on a powerful cluster (e.g. LULU curation was at 20-40% after 4  
311 days of calculation on our cluster).

312

#### 313 **1.4 Statistical analyses**

314       Sequence tables were analysed using R with the packages phyloseq v1.22.3 (McMurdie and  
315 Holmes 2013) following guidelines on online tutorials ([http://joey711.github.io/phyloseq/tutorials-](http://joey711.github.io/phyloseq/tutorials-index.html)  
316 [index.html](http://joey711.github.io/phyloseq/tutorials-index.html)), and vegan v2.5.2 (Oksanen et al. 2018). The datasets were normalized by rarefaction  
317 to their common minimum sequencing depth, before analysis of mock communities and natural  
318 samples.

319       To evaluate the functionality of the pipeline with the mock communities, taxonomically  
320 assigned metazoan clusters were considered as derived from one of the ten species used for the  
321 mock communities when the assignment delivered the corresponding species, genus, family, or  
322 class. Clusters not fitting the expected taxa were labelled as ‘Others’. Apart from PCR errors, these  
323 non-target clusters may also originate from contamination by external DNA from associated  
324 microfauna, or gut content in the case of whole polyps used for cnidarians.

325       Alpha diversity detected using each pipeline in the natural samples was evaluated with the  
326 number of observed target-taxa in the rarefied datasets via analyses of variance (ANOVA) on  
327 generalized linear models based on quasipoisson distribution models. Homogeneity of multivariate  
328 dispersions were verified with the *betapart* package v.1.5.1 (Baselga and Orme 2012). Beta-  
329 diversity patterns were visualised via Principal Coordinates Analyses (PCoA), using Jaccard  
330 dissimilarities for metazoans and Bray-Curtis dissimilarities for prokaryotes. The effect of site and  
331 LULU curation on community composition was tested by means of PERMANOVA, using the  
332 function *adonis2* (vegan), with the same dissimilarities as in PCoAs, and permuting 999  
333 times. Finally, BLAST and RDP taxonomic assignments of the mock samples and the global dataset  
334 were compared at the most adequate pipeline settings for each locus. BLAST-refined (minimum  
335 identity at 70%) and RDP-refined (minimum phylum bootstrap at 80%) datasets were compared



336 on ASV-level for prokaryotes, and OTU-level for metazoans (swarm  $d=3$ , LULU at 84% for COI  
337 and 90% for 18S). As trials on MIDORI-UNIQUE resulted in very poor performance of RDP for  
338 COI (assignments belonging mostly to Insecta), the comparison was performed with MIDORI-  
339 UNIQUE subsampled to marine taxa only.

340

## 341 **2 RESULTS**

### 342 **2.1 Alpha diversity in mock communities**

343 A number of 2 million (18S) and 1.5 million (COI) raw reads were obtained from the two  
344 mock communities (Table S4). After refining, these numbers were decreased to 1.3 million for 18S  
345 and 0.7 million for COI.

346 Seven out of ten mock species were recovered in the 18S dataset and all species were  
347 detected in the COI dataset (Table 1), even with minimum relative DNA abundance levels as low  
348 as 0.7% (Mock 5). Taxonomically unresolved species were correctly assigned up to their common  
349 family or class level. Dominant species generally produced more reads in both the clustered and  
350 non-clustered datasets (Table S6).

351 When ASVs were clustered with swarm v2, this generally led to a slight loss of taxonomic  
352 resolution: *Chorocaris* sp. was not detected in Mock 5 for 18S at  $d > 1$ , and the two bivalves *P.*  
353 *kilmeri* and *C. regab* were taxonomically misidentified for COI at  $d \geq 1$ .

354 Clustering sequences with swarm v2 reduced the number of clusters produced per species,  
355 but some species still produced multiple OTUs even at  $d$  values as high as  $d=11$  for 18S (*A.*  
356 *arbuscula*, *Munidopsis* sp., and *E. norvegica*) and  $d=13$  for COI (*D. dianthus*, *A. muricola*,  
357 *Chorocaris* sp., and *Paralepetopsis* sp.). Curating with LULU allowed reducing the number of  
358 clusters produced per species to nearly one for both loci, but the best results were obtained in  
359 datasets clustered at  $d > 1$  for 18S and  $d \geq 1$  for COI. Moreover, LULU curation tended to decrease

360 the number of non-target clusters (“Others”) (Table 1). In the clustered COI dataset, curating with  
361 LULU at 84% *minimum match* resulted in the most accurate detection of community composition,  
362 and this for all *d* values tested. However, curating with LULU the 18S data (ASVs or OTUs) led  
363 to the loss of one shrimp species (*Chorocaris* sp) when the *minimum match* parameter was at 90%  
364 and an additional species was lost (the limpet *Paralepetopsis* sp.) when this parameter was at 84%.  
365 LULU consistently merged the shrimp species *Chorocaris* sp with another shrimp species as the  
366 latter were always co-occurring in our mock samples.

367

Table 1. Number of ASVs/OTUs detected per species in the mock communities using different bioinformatic pipelines. White cells indicate an exact match with the number of OTUs expected, grey cells indicate a number of OTUs differing by  $\pm 3$  from the number expected, and dark grey cells indicate a number of OTUs  $>3$  from the one expected.

| 18S                                                                  | DADA2 | DADA2+LULU 90% | DADA2+LULU 84% |                                                                 | DADA2+swarm d1/d3/d4/d5/d11 | DADA2+swarm d1/d3/d4/d5/d11 + LULU 90% | DADA2+swarm d1/d3/d4/d5/d11 + LULU 84% |
|----------------------------------------------------------------------|-------|----------------|----------------|-----------------------------------------------------------------|-----------------------------|----------------------------------------|----------------------------------------|
| <b>Mock 3</b>                                                        |       |                |                |                                                                 |                             |                                        |                                        |
| Alcyonacea; <i>A.arbuscula</i>                                       | 64    | 1              | 1              | Alcyonacea; <i>A.arbuscula</i>                                  | 29/11/9/7/6                 | 1/1/1/1/1                              | 1/1/1/1/1                              |
| Caryophylliidae; <i>D.dianthus</i>                                   | 2     | 1              | 1              | Caryophylliidae; <i>D.dianthus</i>                              | 2/2/1/1/1                   | 1/1/1/1/1                              | 1/1/1/1/1                              |
| <i>Alvinocaris muricola</i>                                          | 2     | 1              | 1              | <i>Alvinocaris muricola</i>                                     | 2/1/1/1/1                   | 1/1/1/1/1                              | 1/1/1/1/1                              |
| <i>Chorocaris</i> sp.                                                | 1     | 0              | 0              | <i>Chorocaris</i> sp.                                           | 2/1/1/1/1                   | 0/0/0/0/0                              | 0/0/0/0/0                              |
| <i>Munidopsis</i> sp.                                                | 6     | 1              | 1              | <i>Munidopsis</i> sp.                                           | 5/4/3/3/2                   | 1/1/1/1/1                              | 1/1/1/1/1                              |
| Gastropoda; <i>Paralepetopsis</i> sp.                                | 1     | 1              | 0              | Gastropoda; <i>Paralepetopsis</i> sp.                           | 1/1/1/1/1                   | 1/1/1/1/1                              | 0/0/0/0/0                              |
| Vesicomyiidae; <i>P. kilmeri</i> / <i>C. regab</i> / <i>V. gigas</i> | 8     | 1              | 1              | Bivalvia; <i>P. kilmeri</i> / <i>C. regab</i> / <i>V. gigas</i> | 5/4/4/4/2                   | 1/2/2/2/1                              | 1/1/1/1/1                              |
| Polychaeta; <i>E.norvegica</i>                                       | 8     | 3              | 2              | Polychaeta; <i>E.norvegica</i>                                  | 5/4/4/4/3                   | 3/2/2/2/2                              | 2/1/2/2/2                              |
| Others                                                               | 3     | 3              | 2              | Others                                                          | 4/4/4/4/4                   | 2/2/2/2/3                              | 2/2/2/2/2                              |
| <b>Mock 5</b>                                                        |       |                |                |                                                                 |                             |                                        |                                        |
| Alcyonacea; <i>A.arbuscula</i>                                       | 54    | 1              | 1              | Alcyonacea; <i>A.arbuscula</i>                                  | 28/11/9/7/6                 | 1/1/1/1/1                              | 1/1/1/1/1                              |
| Caryophylliidae; <i>D.dianthus</i>                                   | 1     | 1              | 1              | Caryophylliidae; <i>D.dianthus</i>                              | 1/1/1/1/1                   | 1/1/1/1/1                              | 1/1/1/1/1                              |
| <i>Alvinocaris muricola</i>                                          | 1     | 1              | 1              | <i>Alvinocaris muricola</i>                                     | 1/1/1/1/1                   | 1/1/1/1/1                              | 1/1/1/1/1                              |
| <i>Chorocaris</i> sp.                                                | 1     | 0              | 0              | <i>Chorocaris</i> sp.                                           | 1/0/0/0/0                   | 0/0/0/0/0                              | 0/0/0/0/0                              |
| <i>Munidopsis</i> sp.                                                | 4     | 1              | 1              | <i>Munidopsis</i> sp.                                           | 4/3/3/3/2                   | 1/1/1/1/1                              | 1/1/1/1/1                              |
| Gastropoda; <i>Paralepetopsis</i> sp.                                | 1     | 1              | 0              | Gastropoda; <i>Paralepetopsis</i> sp.                           | 1/1/1/1/1                   | 1/1/1/1/1                              | 0/0/0/0/0                              |
| Vesicomyiidae; <i>P. kilmeri</i> / <i>C. regab</i> / <i>V. gigas</i> | 5     | 1              | 1              | Bivalvia; <i>P. kilmeri</i> / <i>C. regab</i> / <i>V. gigas</i> | 5/3/3/3/2                   | 1/1/1/1/1                              | 1/1/1/1/1                              |
| Polychaeta; <i>E.norvegica</i>                                       | 11    | 3              | 2              | Polychaeta; <i>E.norvegica</i>                                  | 5/4/4/4/3                   | 3/2/2/2/1                              | 2/1/2/2/2                              |
| Others                                                               | 4     | 3              | 2              | Others                                                          | 3/4/4/4/2                   | 4/2/2/2/1                              | 4/2/2/2/3                              |
| COI                                                                  | DADA2 | DADA2+LULU 90% | DADA2+LULU 84% |                                                                 | DADA2+swarm d1/d5/d6/d7/d13 | DADA2+swarm d1/d5/d6/d7/d13 + LULU 90% | DADA2+swarm d1/d5/d6/d7/d13 + LULU 84% |
| <b>Mock 3</b>                                                        |       |                |                |                                                                 |                             |                                        |                                        |
| <i>Acanella arbuscula</i>                                            | 1     | 1              | 1              | <i>Acanella arbuscula</i>                                       | 1/1/1/1/1                   | 1/1/1/1/1                              | 1/1/1/1/1                              |
| Hexacorallia; <i>D.dianthus</i>                                      | 3     | 3              | 3              | Hexacorallia; <i>D.dianthus</i>                                 | 3/4/4/4/3                   | 3/3/3/3/3                              | 3/3/3/3/3                              |
| <i>Alvinocaris A. muricola</i>                                       | 26    | 2              | 2              | <i>Alvinocaris A. muricola</i>                                  | 21/12/10/10/5               | 1/1/1/1/1                              | 1/1/1/1/1                              |
| <i>Chorocaris</i> sp.                                                | 2     | 1              | 1              | <i>Chorocaris</i> sp.                                           | 3/3/3/3/3                   | 1/1/1/1/1                              | 1/1/1/1/1                              |
| <i>Munidopsis</i> sp.                                                | 2     | 1              | 1              | <i>Munidopsis</i> sp.                                           | 3/2/1/1/1                   | 2/1/1/1/1                              | 1/1/1/1/1                              |
| Gastropoda; <i>Paralepetopsis</i> sp.                                | 8     | 2              | 3              | Gastropoda; <i>Paralepetopsis</i> sp.                           | 3/3/3/3/2                   | 2/2/2/2/2                              | 2/2/2/2/2                              |
| <i>Phreagena kilmeri</i>                                             | 2     | 1              | 1              | Bivalvia; <i>P. kilmeri</i>                                     | 2/3/3/3/3                   | 2/2/2/2/2                              | 2/2/2/2/2                              |
| Bivalvia; <i>C. regab</i>                                            | 2     | 1              | 1              | Bivalvia; <i>C. regab</i>                                       |                             |                                        |                                        |
| <i>Vesicomya gigas</i>                                               | 1     | 1              | 1              | <i>Vesicomya gigas</i>                                          | 1/1/1/1/1                   | 1/1/1/1/1                              | 1/1/1/1/1                              |
| Polychaeta; <i>E.norvegica</i>                                       | 3     | 2              | 1              | <i>Eunice norvegica</i>                                         | 2/1/1/1/1                   | 2/1/1/1/1                              | 1/1/1/1/1                              |
| Others                                                               | 7     | 6              | 6              | Others                                                          | 3/3/3/3/4                   | 4/5/5/5/5                              | 5/5/5/5/5                              |
| <b>Mock 5</b>                                                        |       |                |                |                                                                 |                             |                                        |                                        |
| <i>Acanella arbuscula</i>                                            | 1     | 1              | 1              | <i>Acanella arbuscula</i>                                       | 1/1/1/1/1                   | 1/1/1/1/1                              | 1/1/1/1/1                              |
| Hexacorallia; <i>D.dianthus</i>                                      | 3     | 3              | 3              | Hexacorallia; <i>D.dianthus</i>                                 | 3/3/3/3/3                   | 3/3/3/3/3                              | 3/3/3/3/3                              |
| <i>Alvinocaris A. muricola</i>                                       | 26    | 2              | 2              | <i>Alvinocaris A. muricola</i>                                  | 21/12/10/10/5               | 1/1/1/1/1                              | 1/1/1/1/1                              |
| <i>Chorocaris</i> sp.                                                | 1     | 1              | 1              | <i>Chorocaris</i> sp.                                           | 2/2/2/2/2                   | 1/1/1/1/1                              | 1/1/1/1/1                              |
| <i>Munidopsis</i> sp.                                                | 2     | 1              | 1              | <i>Munidopsis</i> sp.                                           | 2/2/1/1/1                   | 1/1/1/1/1                              | 1/1/1/1/1                              |
| Gastropoda; <i>Paralepetopsis</i> sp.                                | 5     | 2              | 2              | Gastropoda; <i>Paralepetopsis</i> sp.                           | 3/2/2/2/2                   | 2/2/2/2/2                              | 2/2/2/2/2                              |
| <i>Phreagena kilmeri</i>                                             | 1     | 1              | 1              | Bivalvia; <i>P. kilmeri</i>                                     | 2/2/2/2/2                   | 2/2/2/2/2                              | 2/2/2/2/2                              |
| Bivalvia; <i>C. regab</i>                                            | 2     | 1              | 1              | Bivalvia; <i>C. regab</i>                                       |                             |                                        |                                        |
| <i>Vesicomya gigas</i>                                               | 1     | 1              | 1              | <i>Vesicomya gigas</i>                                          | 1/1/1/1/1                   | 1/1/1/1/1                              | 1/1/1/1/1                              |
| Polychaeta; <i>E.norvegica</i>                                       | 3     | 2              | 1              | <i>Eunice norvegica</i>                                         | 2/2/2/2/2                   | 1/1/1/1/1                              | 1/1/1/1/1                              |
| Others                                                               | 6     | 5              | 4              | Others                                                          | 2/2/2/2/2                   | 1/2/2/2/2                              | 1/1/1/1/1                              |

369

370

## 371 **2.2 Alpha-diversity patterns in natural samples**

### 372 *High-throughput sequencing results*

373 A number of 44 million (18S), 33 million (COI) and 16 million (16S) reads were obtained  
374 from 42 sediment samples, 4 field controls, 2 extraction blanks, and 4-10 PCR blanks (Table S4).  
375 Two sediment samples failed amplification for the COI marker gene (PCT\_FA\_CT2\_0\_1 and  
376 CHR\_CT1\_0\_1). For metazoans, less reads were retained after bioinformatic processing in  
377 negative controls (36% for 18S, 47% for COI) compared to true samples (~60% for 18S, ~70%  
378 for COI), while the opposite was observed for 16S (74% of reads retained in control samples  
379 against 53% in true samples). Negative control samples (field, extraction, and PCR controls)  
380 contained 2,186,230 (~8%) 18S reads, 1,015,700 (~4%) COI reads, and 2,618,729 (28%) 16S  
381 reads. These reads were mostly originating from the field controls for metazoans (48% for 18S,  
382 55% for COI) and extractions controls for 16S (50%).

383 After blank correction, data refining, and abundance renormalization, rarefaction curves  
384 showed that a plateau was achieved for all samples in both clustered and non-clustered datasets,  
385 suggesting an overall sequencing depth adequate to capture the diversity present (Fig. S1). The  
386 final 18S datasets (with and without clustering at selected  $d$  values) contained 8.9-9.6 million  
387 marine metazoan reads in 42 sediment samples (Table S4), and comprised 57,661 ASVs and  
388 19,504-44,948 OTUs (Table S6). The final COI datasets contained 4.5-6.9 million marine  
389 metazoan reads in 40 sediment samples, and comprised 78,785 ASVs and 44,684-64,669 OTUs.  
390 The 16S datasets contained from 6.6 to 6.7 million prokaryotic reads in 42 sediment samples,  
391 producing 56,577 ASVs and 41,746-14,631 OTUs.

392

393 *Number of clusters among pipelines*

394 The number of metazoan clusters detected in the deep-sea sediment samples varied  
 395 significantly between bioinformatic pipelines chosen (, and also varied significantly among sites  
 396 (Table 2). However, the pipeline effect was consistent across sites although mean cluster numbers  
 397 detected per sample spanned a wide range in all loci (100-800 for 18S, 150-1,500 for COI datasets,  
 398 and 1,500-5,000 for 16S, Fig. 1).

399 Expectedly, clustering significantly reduced the number of detected clusters per sample for  
 400 all loci. Consistent to results observed in mock communities, clustering at  $d=1-13$  resulted in  
 401 comparable OTU numbers for COI, while significantly higher OTU numbers were obtained at  $d=1$   
 402 than with  $d > 1$  for ribosomal loci (Fig. 1, Table 2). DADA2 detected on average 863 (SE=61)  
 403 metazoan COI ASVs per sample, and clustering reduced this number to around 500, regardless the  
 404  $d$ -value. For ribosomal loci, clustering at  $d=3-5$  reduced OTU numbers of around 25-30%  
 405 compared to without clustering, while at  $d=11$ , cluster numbers were halved.

406

Table 2. Effect of pipeline and site on the number of metazoan and prokaryote clusters. Results of the analysis of variance (ANOVA) of the rarefied cluster richness for the three genes studied. Pairwise comparisons were performed with Tukey's HSD tests. DS: Dada2+swarm; DSL: Dada2+swarm+LULU; d: swarm  $d$ -value. Significance codes: \*\*\*:  $p < 0.001$ ; \*\*:  $p < 0.01$ ; \*:  $p < 0.05$ .

| LOCUS            | F-value | p-value     | Significant pairwise comparisons                                |
|------------------|---------|-------------|-----------------------------------------------------------------|
| <b>COI</b>       |         |             |                                                                 |
| Pipeline         | 123.13  | $p < 0.001$ | Dada2 > DS***; DS(d1) > DS(d13)***;                             |
| Site             | 356.37  | $p < 0.001$ | Dada2 > DL***; DS > DSL 84%***; D(S)L 90% > D(S)L 84%***        |
| Pipeline x Site  | 0.16    | $p > 0.05$  | DL > DSL***; DL 90% > DS***                                     |
| <b>18S V1-V2</b> |         |             |                                                                 |
| Pipeline         | 129.16  | $p < 0.001$ | Dada2 > DS(d>1)***; DS(d1) > DS(d>1)***; DS(d11) < DS(d1-5)***; |
| Site             | 154.52  | $p < 0.001$ | Dada2 > DL***; DS > DSL 84%***; D(S)L 90% > D(S)L 84%***;       |
| Pipeline x Site  | 0.49    | $p > 0.05$  | DL 84% < DS***                                                  |
| <b>16S V4-V5</b> |         |             |                                                                 |
| Pipeline         | 179.19  | $p < 0.001$ | Dada2 > DS***;                                                  |
| Site             | 18.46   | $p < 0.001$ | DS(d1) > DS(d>1)***; DS(d11) < DS(d1-5)***                      |
| Pipeline x Site  | 0.06    | $p > 0.05$  |                                                                 |

407

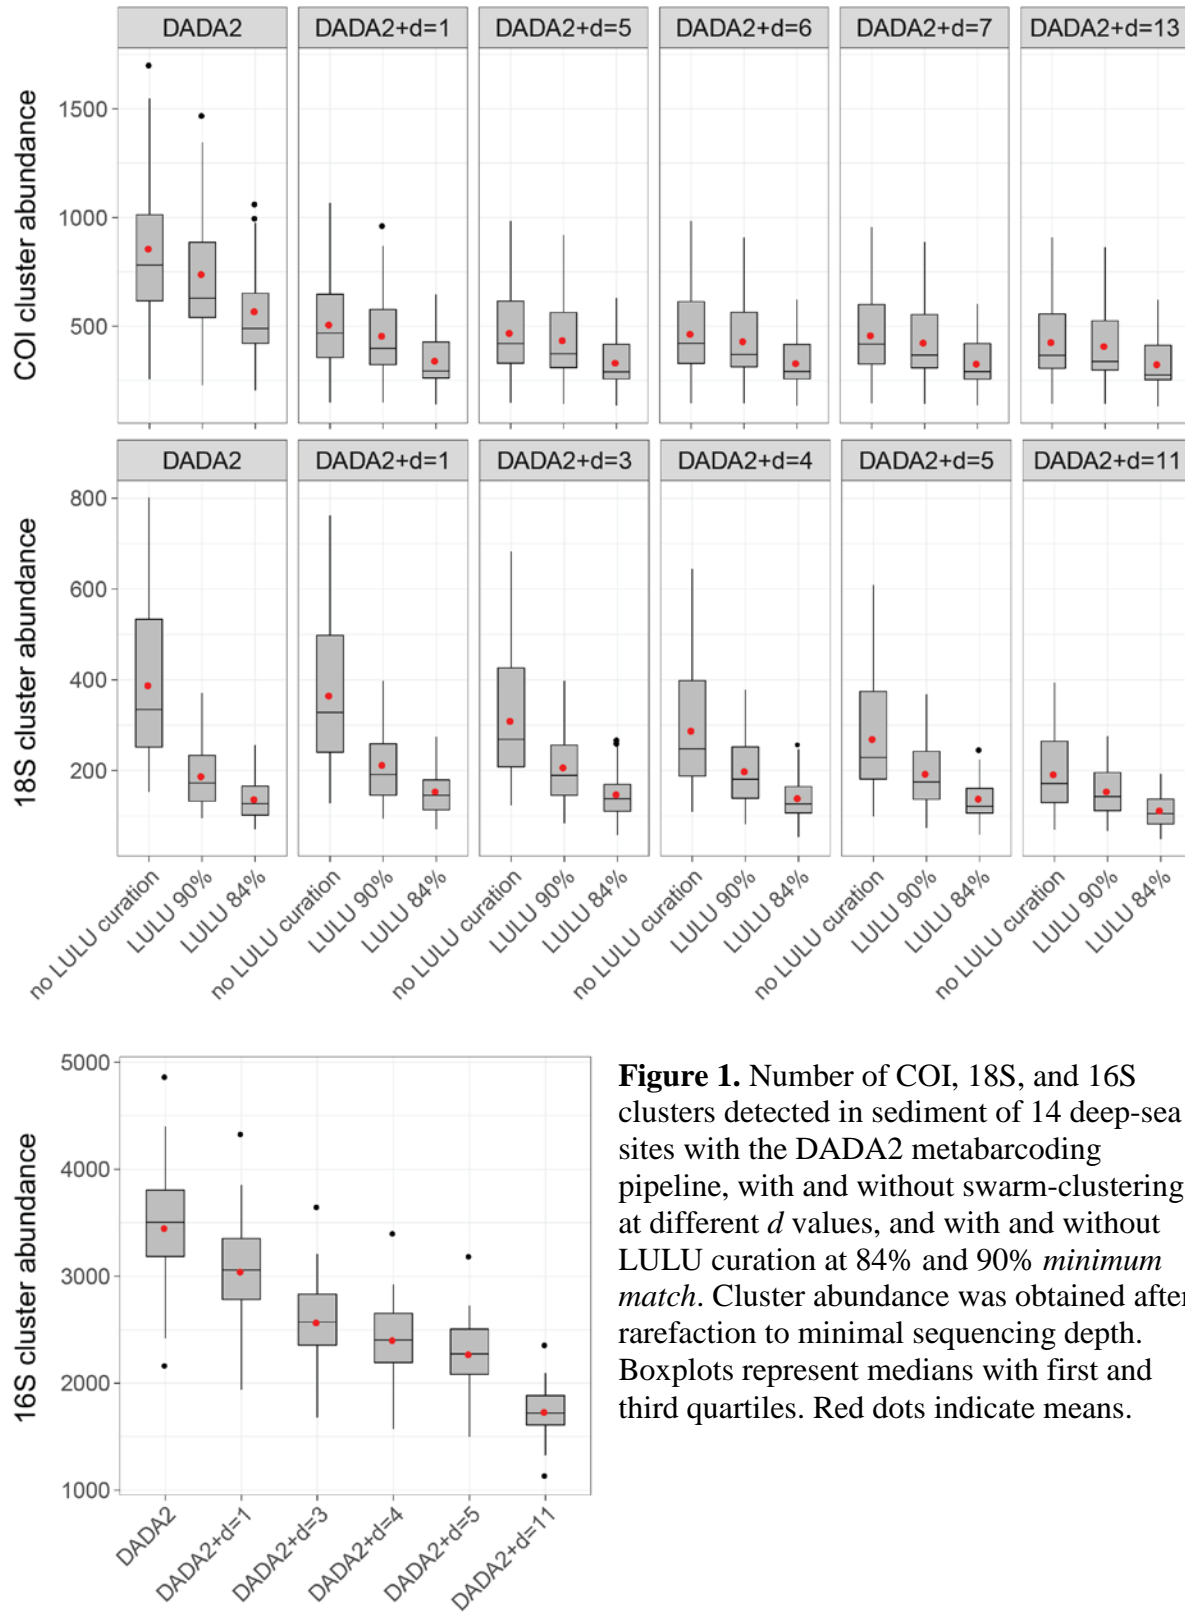

409 LULU curation of metazoan ASVs significantly decreased the number of clusters detected  
410 at both tested *minimum match* values (Table 2). For OTU datasets, the decrease was significant  
411 only when the *minimum match* parameter was at 84%. The effect of LULU curation was stronger  
412 at a lower *minimum match* value for both loci, as LULU curation at 90% of ASVs or OTUs resulted  
413 in significantly more clusters than when the minimum match was at 84% (Table 2). The effect of  
414 LULU curation of was also more pronounced for the 18S locus: LULU decreased by 31-65% the  
415 number of 18S ASVs/OTUs, compared to 7-33% for COI. LULU curation of ASVs or OTUs  
416 resulted in comparable cluster numbers in the 18S datasets, regardless the *d*-value used for  
417 clustering. For example, at 84% *minimum match*, LULU curation produced on average  $137 \pm 7$  and  
418  $140 \pm 8$  clusters per sample after application on ASVs and OTUs ( $d=4$ ) respectively. At 90%, these  
419 numbers were at  $189 \pm 11$  and  $200 \pm 12$  (Fig. 1). This was not the case for COI, where LULU  
420 curation of ASVs resulted in significantly more clusters ( $574 \pm 38$  at 84% and  $742 \pm 53$  at 90%)  
421 than LULU curation of OTUs ( $334 \pm 21$  and  $433 \pm 31$  for  $d=6$ ).

422 Looking at mean ASV and OTU numbers detected per phylum with each pipeline showed  
423 consistent effects of swarm clustering and LULU curation, but highlighted strong differences in  
424 the amount of intragenomic variation between taxonomic groups. For all loci investigated, some  
425 taxa displayed high ASV to OTU ratios, while others were hardly affected by clustering or LULU  
426 curation in terms of numbers of clusters detected (Fig S2).

427

### 428 **2.3 Patterns of beta-diversity between pipelines**

429 Community differences were visualized using PCoA ordinations (Jaccard and Bray-Curtis  
430 dissimilarities for metazoans and prokaryotes respectively) in clustered and non-clustered datasets  
431 (Fig. 2, Fig. S3). Expectedly, PERMANOVAs confirmed that sites differed significantly in terms  
432 of community structure, accounting from 45% to 89% of variation in data. Evaluating the effect of

433 LULU curation (at 84% and 90%) for metazoans showed that LULU-curated data resolved similar  
434 ecological patterns than non-curated data, accounting from 0.5% (COI) to 1.3% (18S) of variation  
435 in data (Fig. 2).

436         Although ASV and OTU datasets detected similar levels of variation due to sites in  
437 PERMANOVAs, clustering levels affected the ecological patterns resolved by ordinations in rRNA  
438 loci (Fig 2). At low  $d$  values ( $d=1-3$ ), ecological patterns were consistent to patterns observed in  
439 the ASV datasets, with samples segregating by site and depth. Increasing  $d$  values produced  
440 stronger segregation among sites, thus resulting in differentiation among ocean basins rather than  
441 depth. This change in resolution occurred with  $d$  values as low as  $d=4$  for 18S but was strongest at  
442  $d=11$  for both rRNA loci (Fig. S3, Fig. 2).

443



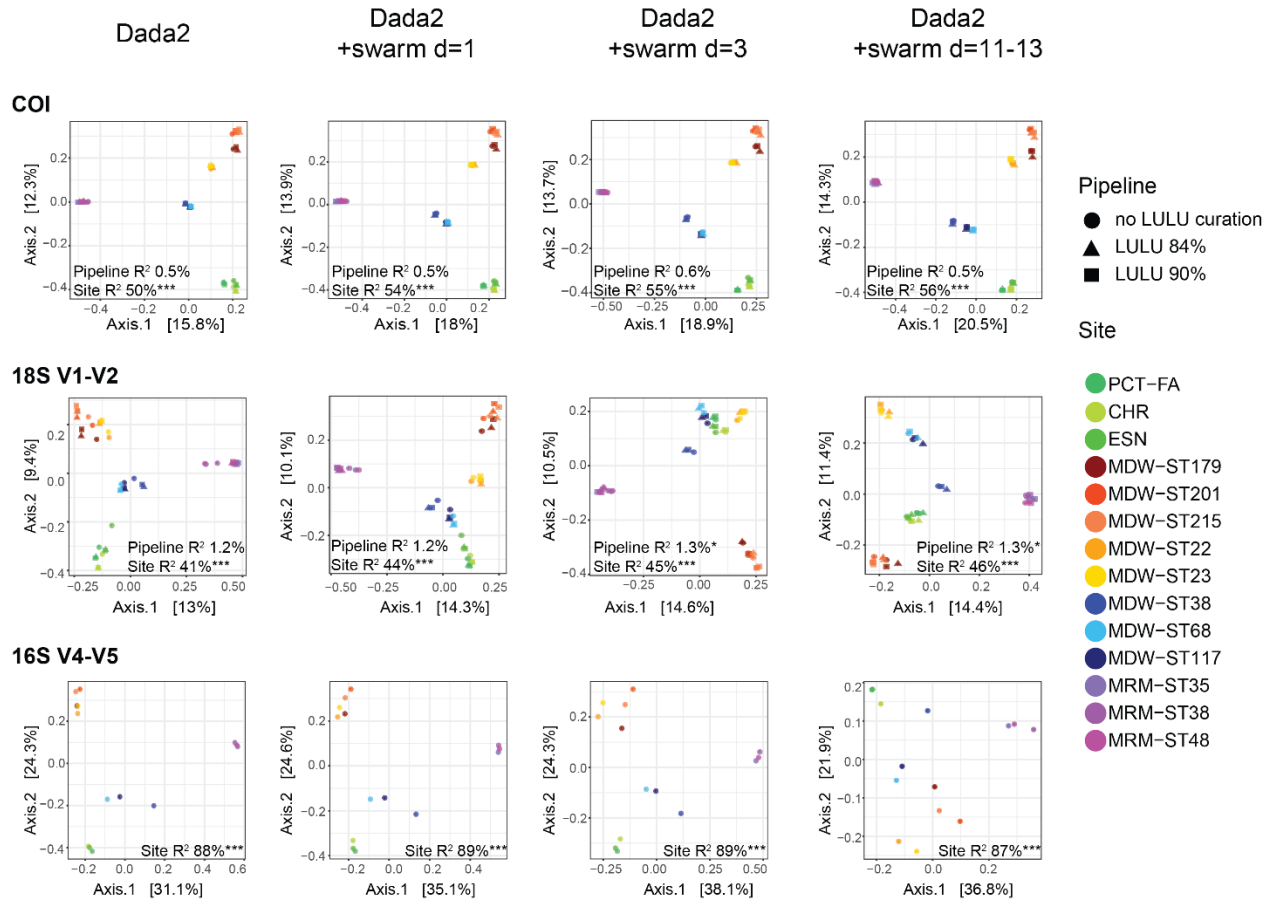

Figure 2. Beta-diversity patterns in ASV and OTU-centred datasets. PCoA ordinations showing community differentiation observed between sites and LULU vs not LULU curated samples, for the DADA2 metabarcoding pipeline with and without clustering. Metazoan datasets were clustered at  $d=1-13$  (COI)  $d=1-11$  (18S) and curated with LULU at two minimum match values. The prokaryote 16S dataset was clustered at  $d=1-11$ . R<sup>2</sup> values and associated p-values obtained in PERMANOVAs are shown in the ordination plots. Significance codes: \*\*\*:  $p < 0.001$ ; \*\*:  $p < 0.01$ ; \*:  $p < 0.05$ . Colour codes: Green: Mediterranean < 1,000 m; Red-yellow: Mediterranean-Atlantic transition zone 300-1,000 m; Blue: North Atlantic < 1,000 m; Purple: Arctic < 1,000 m.

444

445

446

## 447 2.4 Taxonomic assignment quality

448 BLAST and RDP Bayesian Classifier assignments were compared in the mock  
449 communities and natural samples, on data clustered at  $d=3$  and curated with LULU at 84% for COI  
450 and 90% for 18S. For prokaryotes, assignment methods were compared on the ASV-level. BLAST  
451 and RDP assigned similar amounts of OTUs in the prokaryote dataset, but BLAST assigned 20-  
452 70% less OTUs in the metazoan datasets (Table S7). Assigning with BLAST at a minimum of 70%  
453 hit identity resulted in comparable results as described above. Eight of the ten species were  
454 recovered with COI and six species were recovered with 18S, while the vesicomid bivalves were  
455 taxonomically unresolved with both loci (Fig. S4). Although most species produced one single  
456 OTU, between one and three species still resulted in 2-3 OTUs in each mock sample. Assigning  
457 the 18S dataset with RDP resulted in comparable taxonomic resolutions, although more species  
458 produced more than one OTU. Assigning the COI dataset with RDP using the MIDORI-UNIQUE  
459 database resulted in assignments of the mock samples that did not match the expected taxa and  
460 were mostly belonging to arthropods, a problem not observed with BLAST (data not shown). When  
461 the database was reduced to marine-only taxa, all 10 species were detected, and this at expected  
462 OTU abundances, once data was filtered for phylum bootstrap levels  $\geq 80\%$  (Fig S4). However,  
463 applying a phylum bootstrap minimum of 80% resulted in a strong decrease in the number of final  
464 target OTUs, particularly for COI where only 226 OTUs remained after filtering (Table S7). This  
465 reduced recovery with RDP after applying a minimum phylum bootstrap level was not observed in  
466 prokaryotes, where 51,000-55,000 ASVs were left after filtering with both assignment methods  
467 (Table S7).

468 BLAST hit identities of the overall datasets varied strongly depending on phyla and  
469 marker gene (Fig. 3). For 18S, most clusters had hit identities  $\geq 90\%$ . Poorly assigned clusters  
470 (hit identity  $< 90\%$ ) represented less than 20% of the dataset and were mostly assigned to

471 Nematoda, Cnidaria, Tardigrada, Porifera, and Xenacoelomorpha. For COI, nearly all clusters  
472 had similarities to sequences in databases lower than 90%. Overall, arthropods and echinoderms  
473 were detected at similar levels by both markers. The 18S barcode marker performed better in the  
474 detection of nematodes, annelids, platyhelminths, and xenacoelomorphs while COI mostly  
475 detected cnidarians, molluscs, and poriferans (Fig. 3), highlighting the complementarity of these  
476 two loci. BLAST hit identity was much higher for prokaryotes, with most clusters assigned with  
477 more than 90% similarity to sequences in databases. When datasets were filtered for RDP  
478 phylum bootstrap levels  $\geq 80\%$ , most assignments also had high genus bootstrap values for  
479 ribosomal loci. However, for COI, a considerable number of OTUs assigned to arthropods,  
480 cnidarians, molluscs, vertebrates, and poriferans still had genus bootstraps  $< 60\%$ .

481

482

483

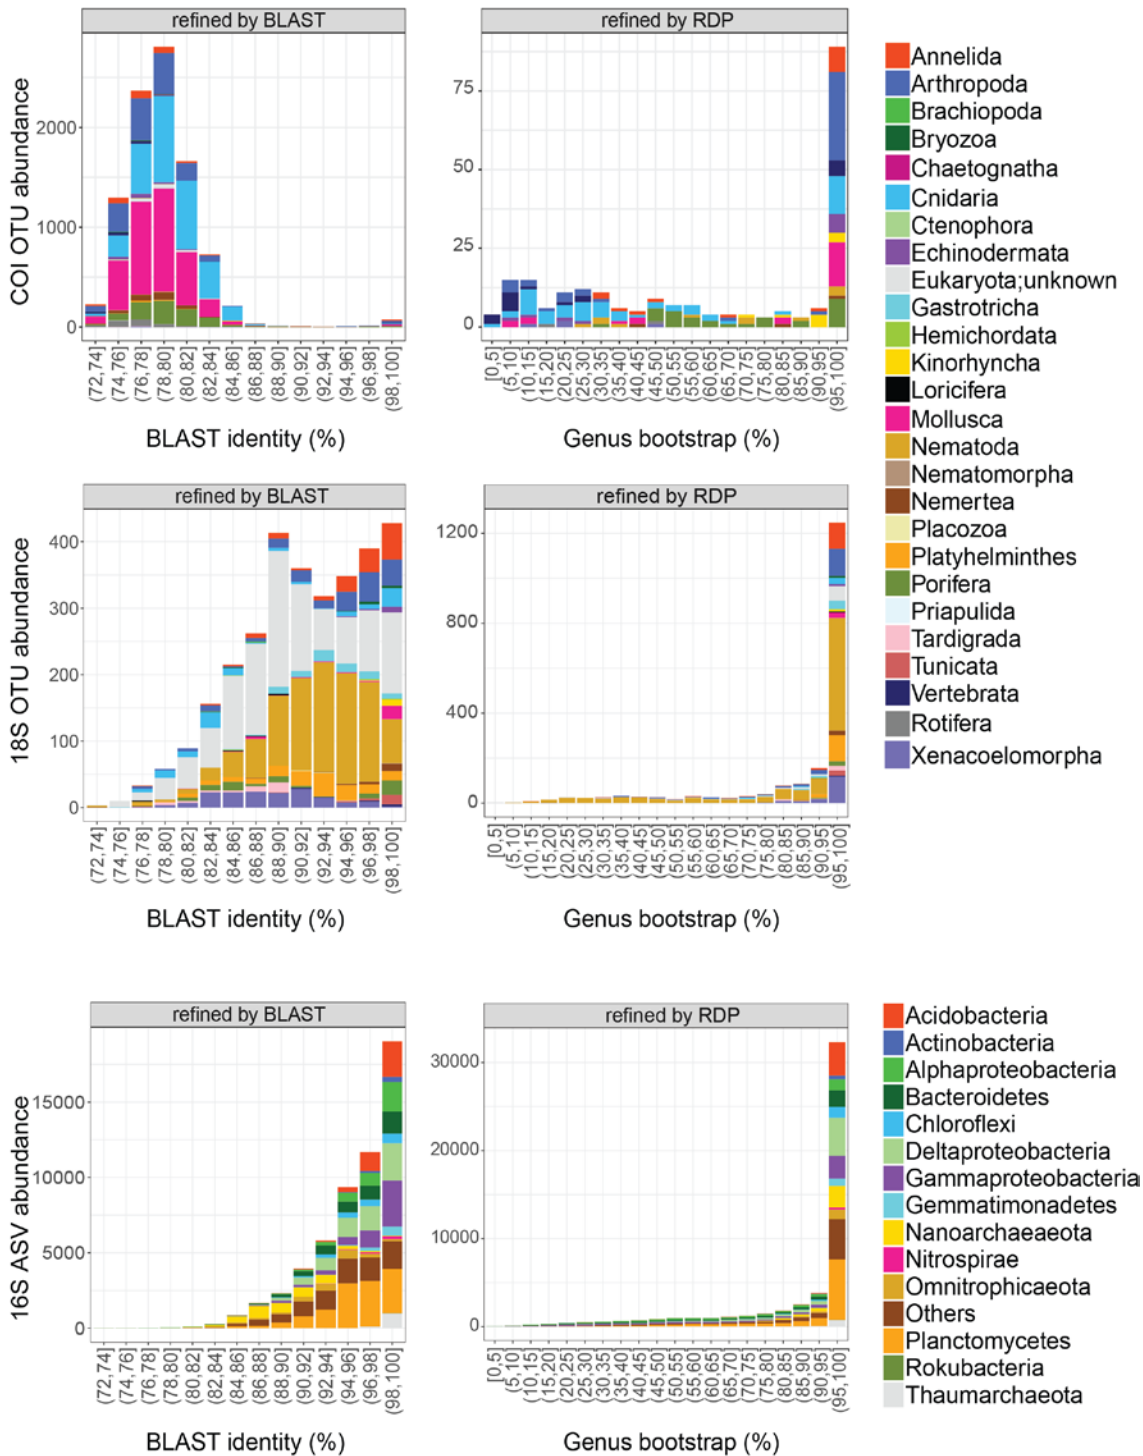

Figure 3. Taxonomic assignment quality of BLAST and RDP methods on metazoan and prokaryote metabarcoding datasets of 14 deep-sea sites. BLAST hit identity of all target clusters detected is given at hit identities > 70%. RDP-assigned data was filtered for phylum bootstraps  $\geq$  80%, and associated genus bootstraps are displayed. Taxonomic assignments were performed on the Silva132 database for 18S and 16S, and on the MIDORI-UNIQUE database, subsampled to marine taxa for COI.

## 486 **3 DISCUSSION**

### 487 **3.1 ASVs and OTUs for genetic vs species diversity**

488 The rise of HTS and the subsequent use of DNA metabarcoding have revolutionized  
489 microbiology by unlocking the access to uncultivable microorganisms, which represent by far the  
490 great majority of prokaryotes (Klappenbach et al. 2001). The development and improvement of  
491 molecular and bioinformatic methods to perform inventories were historically primarily developed  
492 for 16S rRNA barcode loci, before being transferred to the eukaryotic kingdom based on the use  
493 of barcode markers such as 28S and 18S rRNA, ITS, or mitochondrial markers such as COI  
494 (Valentini et al. 2009; Bellemain et al. 2010). Thus, most bioinformatics pipelines were initially  
495 developed accounting for intrinsic properties of prokaryotes and concepts inherent to microbiology  
496 (Caporaso et al. 2010; Schloss et al. 2009; Boyer et al. 2016), before being transferred to eukaryotes  
497 in general, or metazoans in particular. Such application transfers require adaptations to account for  
498 differences in both concepts and basic biological features. One example is the question of the  
499 relevance of using ASVs, advocated to replace OTUs “*as the standard unit of marker-gene analysis*  
500 *and reporting*” (Callahan et al., 2017): an advice for microbiologists that may not apply when  
501 working on metazoans.

502 First, metazoans are well known to exhibit variable and sometimes very high intraspecific  
503 polymorphism in 18S-V1 and above all in COI. Second, the results on the mock samples showed  
504 that single individuals produced very different numbers of ASVs, indicating that ASV-centred  
505 datasets do not reflect actual species composition in metazoans. As this “demultiplication” will be  
506 highly variable across taxa (as seen in Fig. S2, and references such as Plouviez et al. 2009 and  
507 Teixeira et al. 2013), the taxonomic compositions of samples based on ASVs will reflect genetic  
508 rather than species diversity.

509 Clustering ASVs into OTUs and/or curating with LULU alleviated the numerical inflation,  
510 but some species still produced more than one OTU, even at  $d$ -values as high as  $d=11-13$ . While  
511 clustering and LULU curation improved numerical results in the mock communities, they were  
512 associated with a decrease in taxonomic resolution, especially for 18S where some closely related  
513 species were merged with increasing clustering/filtering thresholds (i.e. the vesicomid bivalves,  
514 the gastropod, and the shrimp species; Table 1). When studying natural habitats, very likely to  
515 harbour closely related co-occurring species, both LULU curation and clustering are thus likely to  
516 lead to the loss of true species diversity, particularly for low-resolution markers such as 18S.  
517 Optimal results in the mock samples, i.e. delivering the best balance between the limitation of  
518 spurious clusters and the loss of true species diversity, were obtained with LULU curation at 90%  
519 for 18S and 84% for COI, highlighting the importance of adjusting bioinformatic correction tools  
520 to each barcode marker, a step for which mock communities are most adequate.

### 521

### 522 **3.2 ASVs vs OTUs in natural communities: adapting pipeline parameters to marker**

### 523 **properties**

524 Life histories of organisms, together with intrinsic properties of marker genes, determine  
525 the level of intragenomic and intraspecific diversity. Intraspecific variation is a recognised problem  
526 in metabarcoding, known to generate spurious clusters (Brown et al. 2015), especially in the COI  
527 barcode marker. Indeed, this gene region has increased intragenomic variation due to its high  
528 evolutionary rate but also due to heteroplasmy and the abundance of pseudogenes, such as NUMTs,  
529 playing an important part of the supernumerary OTU richness in COI-metabarcoding (Bensasson  
530 et al. 2001; Song et al. 2008). Together with clustering, LULU curation at 84% proved effective in  
531 limiting the number of multiple clusters produced by single individuals, confirming its efficiency  
532 to correct for intragenomic diversity (Table 1).

533           The mock communities we used here did not contain several haplotypes of the same species  
534 (intraspecific variation), as is most often the case in environmental samples. This prevents us from  
535 generalizing the comparable results obtained after LULU curation of ASVs and OTUs, and the  
536 apparently limited effect of clustering in the mock samples to communities that are more complex.  
537 However, LULU curation of ASVs is not suited to account for natural haplotype diversity: not all  
538 haplotypes co-occur and when they do so, they may vary in proportion and dominance  
539 relationships, making clustering more suited to account for natural haplotypic diversity. Thus,  
540 clustering ASVs will still be necessary to produce inventories of metazoan communities that reflect  
541 species rather than gene diversity.

542           As expected, evaluation of clustering and LULU curation on natural samples showed  
543 distinct results for 18S and COI. Indeed, concerted evolution, a common feature of SSU rRNA  
544 markers such as 16S (Hashimoto et al. 2003; Klappenbach et al. 2001) and 18S (Carranza et al.  
545 1996), limits the amount of intragenomic polymorphism. In metazoans, a lower level of diversity  
546 is expected for the slower evolving 18S gene (Carranza et al. 1996), than for COI which exhibits  
547 faster evolutionary rates (Machida and Knowlton 2012; Machida et al. 2012). This is reflected in  
548 the lower ASV (DADA2) to OTU (DADA2+swarm) ratios observed here for 18S (1.0-2.2.)  
549 compared to COI (2.0-2.7) data at clustering *d*-values comprised between one and seven (Table  
550 S6), underlining the different influence –and importance– of clustering on these loci, and the need  
551 for a versatile, marker by marker choice for clustering and curation parameters. When applying  
552 LULU to ASVs (DADA2) *versus* OTUs (DADA2+swarm) on 18S, similar cluster numbers were  
553 obtained (Fig. 1), suggesting a limited added effect of clustering for this marker once DADA2 and  
554 LULU are applied. This is in line with its slow evolutionary rate (Carranza et al. 1996) leading to  
555 a limited number of haplotypes per species compared to COI. In contrast, for COI, LULU curation  
556 of the ASV dataset led to nearly twice the number of clusters ( $574 \pm 38$  at 84% and  $742 \pm 53$  at



557 90%) compared to LULU curation of OTUs (at  $d=6$ :  $334 \pm 21$  for 84% and  $433 \pm 31$  for 90%).  
558 This confirms the higher intraspecific diversity of COI, and the need to combine clustering with  
559 LULU curation to account for intraspecific diversity in natural samples, especially with highly  
560 polymorphic markers such as COI.

561 Finally, the reproductive mode and pace of selection in microbial populations may lead to  
562 locally lower levels of intraspecific variation than the one expected for metazoans. Prokaryotic  
563 alpha diversity was however also affected by the clustering of ASVs (Fig. 1), supporting the  
564 estimation of a 2.5-fold greater number of 16S rRNA variants than the actual number of bacterial  
565 “species” (Acinas et al. 2004). The significant decrease in the number of OTUs after clustering at  
566  $d=1$  (Table 2, Fig. 1, decrease of ~25%) suggests the occurrence of very closely related 16S rRNA  
567 sequences, possibly belonging to the same ecotype/species. Such entities may still be important to  
568 delineate in studies aiming for example at identifying species associations (i.e. symbiotic  
569 relationships) across large distances and ecosystems, where drift or selection can lead to slightly  
570 different ASVs in space and time, with their function and association remaining stable.

571

### 572 **3.3 Influence on beta diversity**

573 After focusing on alpha diversity estimates, i.e. on the numerical accuracy of inventories,  
574 the analysis of community structures showed that the LULU-curated datasets resolved similar  
575 ecological patterns as datasets not curated with LULU. However, clustering affected resolution of  
576 ecological patterns in ribosomal loci when  $d$  values were high, and this was not the case for COI,  
577 where similar patterns were resolved in all datasets (Fig. 2). This is in accordance with other studies  
578 reporting severe impacts of bioinformatic parameters on alpha diversity while comparable patterns  
579 of beta diversity are observed in ASV and OTU datasets, at least down to a minimum level of  
580 clustering stringency (Xiong and Zhan 2018; Bokulich et al. 2013).



581 Clustering and LULU curation mainly led to the decrease of the number of clusters assigned  
582 to particular taxa in both loci, such as annelids, arthropods, nematodes, or platyhelminthes for 18S,  
583 and chordates, cnidarians, echinoderms, or poriferans for COI (Fig. S2). The strong decrease in  
584 cluster numbers observed in these phyla suggests that the latter have greater intraspecific  
585 polymorphism, although the decrease could also be due to the merging of closely related species,  
586 as both markers have lower taxonomic resolution in particular taxa. This has been acknowledged  
587 for 18S in general, but in nematodes in particular (Derycke et al. 2010), and reported in cnidarians  
588 with COI (Hebert et al. 2003).

589 Overall, based on alpha and beta diversity results observed in mock communities and  
590 natural samples, applying LULU at 84% seems to efficiently curate metazoan COI datasets without  
591 significant loss of species, but clustering is required, at least at  $d=1$ , in order to address high  
592 intraspecific polymorphism. For 18S, LULU curation seems to require values above 84% (e.g.  
593 90%) in order to avoid the loss of species, as seen in the mock communities. However, the low  
594 taxonomic resolution obtained with this marker suggests that clustering should be performed at low  
595  $d$ -values ( $d < 4$ ) to address intraspecific polymorphism without affecting beta-diversity patterns. For  
596 prokaryotes, clustering 16S ASVs at  $d=1$  reduces the number of detected clusters by ~25%, which  
597 may help addressing intragenomic variation when needed.

598

### 599 **3.4 Taxonomic resolution and assignment quality**

600 The COI locus allowed the detection of all ten species present in the mock samples,  
601 compared to seven in the 18S dataset (Table 1). This locus also provided much more accurate  
602 assignments, most of them correct at the genus (and species) level, confirming that COI uncovers  
603 more metazoan species and offers a better taxonomic resolution than 18S (Tang et al. 2012; Clarke  
604 et al. 2017; Andújar et al. 2018). Our results also support approaches combining nuclear and

605 mitochondrial markers to achieve more comprehensive biodiversity inventories (Cowart et al.  
606 2015; Drummond et al. 2015; Zhan et al. 2014). Indeed, strong differences exist in amplification  
607 success among taxa (Bhadury et al. 2006; Carugati et al. 2015), exemplified by nematodes, which  
608 are well detected with 18S but not with COI (Bucklin et al. 2011). The high complementarity of  
609 COI and 18S in terms of targeted taxa (highlighted in Fig. S2), also supports the approach taken  
610 by Stefanni et al. (2018), as subsampling each gene dataset for its “best targeted phyla” and  
611 subsequently combining both seems to be a very efficient way to produce comprehensive and non-  
612 redundant biodiversity inventories.

613 Finally, compared to BLAST assignments, similar taxonomic resolution was observed  
614 using the RDP Bayesian Classifier on the mock samples for 18S (Fig. S4) and for COI when using  
615 the MIDORI-UNIQUE marine-only database. Poor performance of RDP using the full MIDORI  
616 database is likely due to the size of the database, and to its low coverage of deep-sea species. The  
617 problem of underrepresentation of deep-sea taxa is especially apparent with the BLAST  
618 assignments, which generally displayed low identities to sequences in databases, especially for COI  
619 (Fig. 3). Using minimum similarities of 80% for COI and 86% for 18S as cut-off values for  
620 metazoans has been shown to improve the taxonomic quality of metazoan metabarcoding datasets  
621 (Stefanni et al. 2018). However, phylogenies of marine invertebrates have found high levels of  
622 species divergence (up to ~30%), even within genera (Zanol et al. 2010). Consequently, studies on  
623 deep-sea taxa have found that some invertebrate species had COI sequences diverging more than  
624 20% from any other species present in molecular databases (Shank et al. 1999; Herrera et al. 2015).  
625 At present, it thus seems difficult to work at taxonomic levels beyond phylum-level with deep-sea  
626 metabarcoding data when using large public databases. Small databases, taxonomically similar to  
627 the targeted communities, and with sequences of the same length as the amplified fragment of  
628 interest, are known to maximise accurate identification (Macheriotou et al. 2019). When using the

629 reduced marine-only COI database, RDP provided the most accurate assignments in the mock  
630 samples when the phylum bootstrap level was  $\geq 80$  (Fig. S 4), although this filtering threshold  
631 drastically reduced the number of OTUs in the overall dataset (Table S7). The development of  
632 custom-built marine RDP training sets, without overrepresentation of terrestrial species, is  
633 therefore needed for this Bayesian assignment method to be effective on deep-sea datasets. With  
634 reduced and more specific databases, removing clusters with phylum bootstrap-level  $< 80$  should  
635 be an efficient way to increase taxonomic quality of deep-sea metabarcoding datasets. At present,  
636 if accurate taxonomic assignments are sought while using universal primers, we advocate assigning  
637 taxonomy in two steps: first, using BLAST and a large database including all phyla amplifiable by  
638 the primer set, extracting the clusters belonging to the groups of interest, then re-assigning  
639 taxonomy to these target taxa using RDP and a smaller, taxon-specific database.

640

## 641 **CONCLUSIONS AND PERSPECTIVES**

642 Using mock communities and natural samples, we evaluate several recent algorithms and  
643 assess their capacity to improve the quality of molecular biodiversity inventories of metazoans and  
644 prokaryotes. Our results support the fact that ASV data should be produced and communicated for  
645 reusability and reproducibility following the recommendations of Callahan et al. (2017). This is  
646 especially useful in large projects spanning wide geographic zones and time scales, as different  
647 ASV datasets can be easily merged *a posteriori*, and clustered if necessary afterwards.  
648 Nevertheless, clustering ASVs into OTUs will be required to obtain accurate species-level  
649 inventories, at least for metazoan communities, with a more severe influence of clustering observed  
650 on alpha diversity estimates than beta-diversity patterns. Considering 16S polymorphism observed  
651 in prokaryotic species (Acinas et al. 2004) and the possible geographic segregation of their  
652 populations, clustering may also be required in prokaryotic datasets, for example in studies

653 screening for species associations (i.e. symbiotic relationships) as symbionts may be prone to  
654 differential fixation through enhanced drift (Shapiro, Leducq, & Mallet, 2016).

655 Our results also demonstrated that LULU effectively curates metazoan biodiversity  
656 inventories obtained through metabarcoding. They also underline the need to adapt parameters for  
657 curation (e.g. LULU curation at 90% for 18S and 84% for COI) and clustering to each gene used  
658 and taxonomic compartment targeted, in order to identify an optimal balance between the  
659 correction for spurious clusters and the merging of closely related species.

660 Finally, our findings also showed that accurate taxonomic assignments of deep-sea species  
661 can be obtained with the RDP Bayesian Classifier, but only with reduced databases containing  
662 ecosystem-specific sequences.

663 The pipeline is publicly available on Gitlab (<https://gitlab.ifremer.fr/abyss-project/>), and  
664 allows the use of sequence data obtained from libraries produced by double PCR or adaptor ligation  
665 methods, as well as having built-in options for using six commonly used metabarcoding primers.

666

667

## 668 **ACKNOWLEDGEMENTS**

669 This work is part of the “*Pourquoi Pas les Abysses?*” project, funded by Ifremer and the  
670 eDNAbyss (AP2016 -228) project, funded by France Génomique (ANR-10-INBS-09) and  
671 Genoscope-CEA. We wish to thank Caroline Dussart for her contribution to the early  
672 developments of bioinformatic scripts and Patrick Durand for bioinformatic support, Cathy  
673 Liautard-Haag for her help with lab management, and Babett Guenther for help in barcoding. We  
674 also wish to express our gratitude to the participants and mission chiefs of the Essnaut (Marie-  
675 Anne Cambon Bonavita), MarMine (Eva Ramirez Llodra, project 247626/O30 (NRC-BI),  
676 PEACETIME (Cécile Guieu and Christian Tamburini), CanHROV (Marie Claire Fabri) and

677 MEDWAVES (Covadonga Orejas) cruises. The MEDWAVES cruise was organised in the  
678 framework of the ATLAS Project, supported by the European Union 2020 Research and  
679 Innovation Programme under grant agreement number: 678760. We thank Stefaniya Kamenova,  
680 Tiago Pereira, and an anonymous referee for their comments on a previous version of this  
681 manuscript.

682

## 683 REFERENCES

- 684 Acinas, Silvia G, Luisa A Marcelino, Vanja Klepac-Ceraj, and Martin F Polz. 2004. ‘Divergence  
685 and Redundancy of 16S RRNA Sequences in Genomes with Multiple Rrn Operons’.  
686 *Journal of Bacteriology* 186 (9): 2629–35. [https://doi.org/10.1128/JB.186.9.2629-](https://doi.org/10.1128/JB.186.9.2629-2635.2004)  
687 [2635.2004](https://doi.org/10.1128/JB.186.9.2629-2635.2004).
- 688 Alberdi, Antton, Ostaizka Aizpurua, M. Thomas P. Gilbert, and Kristine Bohmann. 2017.  
689 ‘Scrutinizing Key Steps for Reliable Metabarcoding of Environmental Samples’. Edited by  
690 Andrew Mahon. *Methods in Ecology and Evolution*, 2017. [https://doi.org/10.1111/2041-](https://doi.org/10.1111/2041-210X.12849)  
691 [210X.12849](https://doi.org/10.1111/2041-210X.12849).
- 692 Andújar, Carmelo, Paula Arribas, Douglas W. Yu, Alfried P. Vogler, and Brent C. Emerson.  
693 2018. ‘Why the COI Barcode Should Be the Community DNA Metabarcoding for the  
694 Metazoa’. *Molecular Ecology* 27 (20): 3968–75. <https://doi.org/10.1111/mec.14844>.
- 695 Baselga, Andrés, and C. David L. Orme. 2012. ‘Betapart : An R Package for the Study of Beta  
696 Diversity’. *Methods in Ecology and Evolution* 3 (5): 808–12. [https://doi.org/10.1111/j.2041-](https://doi.org/10.1111/j.2041-210X.2012.00224.x)  
697 [210X.2012.00224.x](https://doi.org/10.1111/j.2041-210X.2012.00224.x).
- 698 Bazin, Eric, Sylvain Glémin, and Nicolas Galtier. 2006. ‘Population Size Does Not Influence

- 699 Mitochondrial Genetic Diversity in Animals’. *Science* 312 (5773): 570–72.
- 700 <https://doi.org/10.1126/science.1122033>.
- 701 Bellemain, Eva, Tor Carlsen, Christian Brochmann, Eric Coissac, Pierre Taberlet, and Håvard  
702 Kauserud. 2010. ‘ITS as an Environmental DNA Barcode for Fungi: An in Silico Approach  
703 Reveals Potential PCR Biases’. *BMC Microbiology* 10 (July): 189.
- 704 <https://doi.org/10.1186/1471-2180-10-189>.
- 705 Bensasson, Doua, De Xing Zhang, Daniel L. Hartl, and Godfrey M. Hewitt. 2001.  
706 ‘Mitochondrial Pseudogenes: Evolution’s Misplaced Witnesses’. *Trends in Ecology and*  
707 *Evolution*. [https://doi.org/10.1016/S0169-5347\(01\)02151-6](https://doi.org/10.1016/S0169-5347(01)02151-6).
- 708 Bhadury, P, M C Austen, D T Bilton, P J D Lamshead, A D Rogers, and G R Smerdon. 2006.  
709 ‘Molecular Detection of Marine Nematodes from Environmental Samples: Overcoming  
710 Eukaryotic Interference’. *Aquatic Microbial Ecology* 44 (1): 97–103. <https://doi.org/10.3354/Ame044097>.
- 711
- 712 Bik, Holly M., Way Sung, Paul De Ley, James G Baldwin, Jyotsna Sharma, Axayácatl Rocha-  
713 Olivares, and W Kelley Thomas. 2012. ‘Metagenetic Community Analysis of Microbial  
714 Eukaryotes Illuminates Biogeographic Patterns in Deep-Sea and Shallow Water Sediments.’  
715 *Molecular Ecology* 21 (5): 1048–59. <https://doi.org/10.1111/j.1365-294X.2011.05297.x>.
- 716 Bista, Iliana, G Carvalho, K Walsh, M Christmas, Mehrdad Hajibabaei, P Kille, D Lallias, and  
717 Simon Creer. 2015. ‘Monitoring Lake Ecosystem Health Using Metabarcoding of  
718 Environmental DNA: Temporal Persistence and Ecological Relevance’. *Genome* 58 (5):  
719 197.
- 720 Bokulich, Nicholas A, Sathish Subramanian, Jeremiah J Faith, Dirk Gevers, Jeffrey I Gordon,  
721 Rob Knight, David A Mills, and J Gregory Caporaso. 2013. ‘Quality-Filtering Vastly  
722 Improves Diversity Estimates from Illumina Amplicon Sequencing’. *Nature Methods* 10 (1):

- 723 57–59. <https://doi.org/10.1038/nmeth.2276>.
- 724 Boussarie, Germain, Judith Bakker, Owen S. Wangensteen, Stefano Mariani, Lucas Bonnin, Jean  
725 Baptiste Juhel, Jeremy J. Kiszka, et al. 2018. ‘Environmental DNA Illuminates the Dark  
726 Diversity of Sharks’. *Science Advances* 4 (5): eaap9661.  
727 <https://doi.org/10.1126/sciadv.aap9661>.
- 728 Boyer, F, C Mercier, A Bonin, Y Le Bras, Pierre Taberlet, and Eric Coissac. 2016. ‘OBITOOLS:  
729 A UNIX-Inspired Software Package for DNA Metabarcoding’. *Molecular Ecology*  
730 *Resources* 16 (1): 176–82. <https://doi.org/10.1111/1755-0998.12428>.
- 731 Brannock, P M, and K M Halanych. 2015. ‘Meiofaunal Community Analysis by High-  
732 Throughput Sequencing: Comparison of Extraction, Quality Filtering, and Clustering  
733 Methods’. *Marine Genomics* 23: 67–75. <https://doi.org/10.1016/j.margen.2015.05.007>.
- 734 Brown, E A, F J J Chain, T J Crease, H J MacIsaac, and M E Cristescu. 2015. ‘Divergence  
735 Thresholds and Divergent Biodiversity Estimates: Can Metabarcoding Reliably Describe  
736 Zooplankton Communities?’ *Ecology and Evolution* 5 (11): 2234–51.  
737 <https://doi.org/10.1002/ece3.1485>.
- 738 Bucklin, Ann, Dirk Steinke, and Leocadio Blanco-Bercial. 2011. ‘DNA Barcoding of Marine  
739 Metazoa’. *Annual Review of Marine Science* 3 (1): 471–508.  
740 <https://doi.org/10.1146/annurev-marine-120308-080950>.
- 741 Callahan, Benjamin J., Paul J. McMurdie, Michael J. Rosen, Andrew W. Han, Amy Jo A.  
742 Johnson, and Susan P. Holmes. 2016. ‘DADA2: High-Resolution Sample Inference from  
743 Illumina Amplicon Data’. *Nature Methods* 13 (7): 581–83.  
744 <https://doi.org/10.1038/nmeth.3869>.
- 745 Callahan, Benjamin J., Paul J McMurdie, and Susan P Holmes. 2017. ‘Exact Sequence Variants  
746 Should Replace Operational Taxonomic Units in Marker-Gene Data Analysis’. *ISME*

- 747 *Journal* 11 (12): 2639–43. <https://doi.org/10.1038/ismej.2017.119>.
- 748 Caporaso, J Gregory, Justin Kuczynski, Jesse Stombaugh, Kyle Bittinger, Frederic D Bushman,  
749 Elizabeth K Costello, Noah Fierer, et al. 2010. ‘QIIME Allows Analysis of High-  
750 Throughput Community Sequencing Data’. *Nature Methods* 7 (5): 335–36.  
751 <https://doi.org/10.1038/nmeth.f.303>.
- 752 Carranza, Salvador, Gonzalo Giribet, Carles Ribera, Jaume Baguña, and Marta Riutort. 1996.  
753 ‘Evidence That Two Types of 18S rDNA Coexist in the Genome of *Dugesia* (Schmidtea)  
754 *Mediterranea* (Platyhelminthes, Turbellaria, Tricladida)’. *Molecular Biology and Evolution*  
755 13 (6): 824–32. <https://doi.org/10.1093/oxfordjournals.molbev.a025643>.
- 756 Carugati, Laura, Cinzia Corinaldesi, Antonio Dell’Anno, and Roberto Danovaro. 2015.  
757 ‘Metagenetic Tools for the Census of Marine Meiofaunal Biodiversity: An Overview’.  
758 *Marine Genomics* 24 (December): 11–20. <https://doi.org/10.1016/j.margen.2015.04.010>.
- 759 Clare, Elizabeth L., Frédéric J.J. Chain, Joanne E. Littlefair, and Melania E. Cristescu. 2016. ‘The  
760 Effects of Parameter Choice on Defining Molecular Operational Taxonomic Units and  
761 Resulting Ecological Analyses of Metabarcoding Data’. Edited by Kristy Deiner. *Genome*  
762 59 (11): 981–90. <https://doi.org/10.1139/gen-2015-0184>.
- 763 Clarke, Laurence J., Jason M. Beard, Kerrie M. Swadling, and Bruce E. Deagle. 2017. ‘Effect of  
764 Marker Choice and Thermal Cycling Protocol on Zooplankton DNA Metabarcoding  
765 Studies’. *Ecology and Evolution* 7 (3): 873–83. <https://doi.org/10.1002/ece3.2667>.
- 766 Cohan, Frederick M. 2001. ‘Bacterial Species and Speciation’. Edited by M. Kane. *Systematic*  
767 *Biology* 50 (4): 513–24. <https://doi.org/10.1080/10635150118398>.
- 768 Coissac, Eric, Tiayyba Riaz, and Nicolas Puillandre. 2012. ‘Bioinformatic Challenges for DNA  
769 Metabarcoding of Plants and Animals’. *Molecular Ecology* 21 (8): 1834–47.  
770 <https://doi.org/10.1111/j.1365-294X.2012.05550.x>.



- 771 Cowart, Dominique A, Miguel Pinheiro, Olivier Mouchel, Marion Maguer, Jacques Grall,  
772 Jacques Miné, and Sophie Arnaud-Haond. 2015. ‘Metabarcoding Is Powerful yet Still Blind:  
773 A Comparative Analysis of Morphological and Molecular Surveys of Seagrass  
774 Communities’. *PLoS One* 10 (2): e0117562. <https://doi.org/10.1371/journal.pone.0117562>.
- 775 Creer, Simon, Kristy Deiner, Serita Frey, Dorota Porazinska, Pierre Taberlet, W. Kelley Thomas,  
776 Caitlin Potter, and Holly M. Bik. 2016. ‘The Ecologist’s Field Guide to Sequence-Based  
777 Identification of Biodiversity’. Edited by Robert Freckleton. *Methods in Ecology and  
778 Evolution* 7 (9): 1008–18. <https://doi.org/10.1111/2041-210X.12574>.
- 779 Davis, Nicole M., Diana M. Proctor, Susan P. Holmes, David A. Relman, and Benjamin J.  
780 Callahan. 2018. ‘Simple Statistical Identification and Removal of Contaminant Sequences in  
781 Marker-Gene and Metagenomics Data’. *Microbiome* 6 (1): 226.  
782 <https://doi.org/10.1186/s40168-018-0605-2>.
- 783 Deiner, Kristy, Emanuel A. Fronhofer, Elvira Mächler, Jean Claude Walser, and Florian  
784 Altermatt. 2016. ‘Environmental DNA Reveals That Rivers Are Conveyor Belts of  
785 Biodiversity Information’. *Nature Communications* 7 (1): 12544.  
786 <https://doi.org/10.1038/ncomms12544>.
- 787 Deiner, Kristy, Jean-Claude C Walser, E Machler, Florian Altermatt, Elvira Mächler, and Florian  
788 Altermatt. 2015. ‘Choice of Capture and Extraction Methods Affect Detection of Freshwater  
789 Biodiversity from Environmental DNA’. *Biological Conservation* 183 (March): 53–63.  
790 <https://doi.org/10.1016/j.biocon.2014.11.018>.
- 791 Dejean, Tony, Alice Valentini, Antoine Duparc, Stephanie Pellier-Cuit, Francois Pompanon,  
792 Pierre Taberlet, and Claude Miaud. 2011. ‘Persistence of Environmental DNA in Freshwater  
793 Ecosystems’. *PLoS One* 6 (8). <https://doi.org/10.1371/journal.pone.0023398>.
- 794 Derycke, Sofie, Jan Vanaverbeke, Annelien Rigaux, Thierry Backeljau, and Tom Moens. 2010.

- 795 'Exploring the Use of Cytochrome Oxidase c Subunit 1 (COI) for DNA Barcoding of Free-  
796 Living Marine Nematodes'. Edited by Peter Roopnarine. *PLoS ONE* 5 (10): e13716.  
797 <https://doi.org/10.1371/journal.pone.0013716>.
- 798 Dickie, Ian A., Stephane Boyer, Hannah L. Buckley, Richard P. Duncan, Paul P. Gardner, Ian D.  
799 Hogg, Robert J. Holdaway, et al. 2018. 'Towards Robust and Repeatable Sampling Methods  
800 in EDNA-Based Studies'. *Molecular Ecology Resources*. Wiley/Blackwell (10.1111).  
801 <https://doi.org/10.1111/1755-0998.12907>.
- 802 Drummond, A J, R D Newcomb, T R Buckley, D Xie, A Dopheide, B C M Potter, J Heled, et al.  
803 2015. 'Evaluating a Multigene Environmental DNA Approach for Biodiversity  
804 Assessment'. *Gigascience* 4. <https://doi.org/ARTN 4610.1186/s13742-015-0086-1>.
- 805 Eren, A Murat, Joseph H Vineis, Hilary G Morrison, and Mitchell L Sogin. 2013. 'A Filtering  
806 Method to Generate High Quality Short Reads Using Illumina Paired-End Technology'.  
807 *PLoS ONE* 8 (6): e66643. <https://doi.org/10.1371/journal.pone.0066643>.
- 808 Escudié, Frédéric, Lucas Auer, Maria Bernard, Mahendra Mariadassou, Laurent Cauquil, Katia  
809 Vidal, Sarah Maman, et al. 2018. 'FROGS: Find, Rapidly, OTUs with Galaxy Solution'.  
810 Edited by Bonnie Berger. *Bioinformatics* 34 (8): 1287–94.  
811 <https://doi.org/10.1093/bioinformatics/btx791>.
- 812 Evans, N T, B P Olds, M A Renshaw, C R Turner, Y Y Li, C L Jerde, A R Mahon, M E Pfrender,  
813 G A Lamberti, and D M Lodge. 2016. 'Quantification of Mesocosm Fish and Amphibian  
814 Species Diversity via Environmental DNA Metabarcoding'. *Molecular Ecology Resources*  
815 16 (1): 29–41. <https://doi.org/10.1111/1755-0998.12433>.
- 816 Ficetola, Gentile Francesco, Johan Pansu, Aurélie Bonin, Eric Coissac, Charline Giguët-Covex,  
817 Marta De Barba, Ludovic Gielly, et al. 2015. 'Replication Levels, False Presences and the  
818 Estimation of the Presence/Absence from EDNA Metabarcoding Data'. *Molecular Ecology*

- 819 *Resources* 15 (3): 543–56. <https://doi.org/10.1111/1755-0998.12338>.
- 820 Fonseca, Vera G. 2018. ‘Pitfalls in Relative Abundance Estimation Using Edna Metabarcoding’.
- 821 *Molecular Ecology Resources* 18 (5): 923–26. <https://doi.org/10.1111/1755-0998.12902>.
- 822 Fonseca, Vera G., Gary R Carvalho, Way Sung, Harriet F Johnson, Deborah M Power, Simon P
- 823 Neill, Margaret Packer, et al. 2010. ‘Second-Generation Environmental Sequencing
- 824 Unmasks Marine Metazoan Biodiversity’. *Nature Communications* 1.
- 825 <https://doi.org/9810.1038/ncomms1095>.
- 826 Frøslev, Tobias Guldborg, Rasmus Kjølner, Hans Henrik Bruun, Rasmus Ejrnæs, Ane Kirstine
- 827 Brunbjerg, Carlotta Pietroni, and Anders Johannes Hansen. 2017. ‘Algorithm for Post-
- 828 Clustering Curation of DNA Amplicon Data Yields Reliable Biodiversity Estimates’.
- 829 *Nature Communications* 8 (1). <https://doi.org/10.1038/s41467-017-01312-x>.
- 830 Gevers, Dirk, Frederick M. Cohan, Jeffrey G. Lawrence, Brian G. Spratt, Tom Coenye, Edward
- 831 J. Feil, Erko Stackebrandt, et al. 2005. ‘Re-Evaluating Prokaryotic Species’. *Nature Reviews*
- 832 *Microbiology* 3 (9): 733–39. <https://doi.org/10.1038/nrmicro1236>.
- 833 Goldberg, Caren S., Cameron R. Turner, Kristy Deiner, Katy E. Klymus, Philip Francis
- 834 Thomsen, Melanie A. Murphy, Stephen F. Spear, et al. 2016. ‘Critical Considerations for the
- 835 Application of Environmental DNA Methods to Detect Aquatic Species’. Edited by M.
- 836 Gilbert. *Methods in Ecology and Evolution* 7 (11): 1299–1307.
- 837 <https://doi.org/10.1111/2041-210X.12595>.
- 838 Hashimoto, Joel G, Bradley S Stevenson, and Thomas M Schmidt. 2003. ‘Rates and
- 839 Consequences of Recombination between RRNA Operons’. *Journal of Bacteriology* 185
- 840 (3): 966–72. <https://doi.org/10.1128/JB.185.3.966-972.2003>.
- 841 Hebert, Paul D.N., Sujeevan Ratnasingham, and Jeremy R. de Waard. 2003. ‘Barcoding Animal
- 842 Life: Cytochrome c Oxidase Subunit 1 Divergences among Closely Related Species’.

- 843 *Proceedings of the Royal Society of London. Series B: Biological Sciences* 270 (suppl\_1):  
844 S96-9. <https://doi.org/10.1098/rsbl.2003.0025>.
- 845 Herrera, Santiago, Hiromi Watanabe, and Timothy M. Shank. 2015. 'Evolutionary and  
846 Biogeographical Patterns of Barnacles from Deep-Sea Hydrothermal Vents'. *Molecular*  
847 *Ecology* 24 (3): 673–89. <https://doi.org/10.1111/mec.13054>.
- 848 Ji, Yinqiu, Louise Ashton, Scott M Pedley, David P Edwards, Yong Tang, Akihiro Nakamura,  
849 Roger Kitching, et al. 2013. 'Reliable, Verifiable and Efficient Monitoring of Biodiversity  
850 via Metabarcoding'. *Ecology Letters* 16 (10): 1245–57. <https://doi.org/10.1111/ele.12162>.
- 851 Klappenbach, J A, Paul R. Saxman, Cole James R., and Thomas M. Schmidt. 2001. 'Rrndb: The  
852 Ribosomal RNA Operon Copy Number Database'. *Nucleic Acids Research* 29 (1): 181–84.  
853 <https://doi.org/10.1093/nar/29.1.181>.
- 854 Leray, Matthieu, J Y Yang, C P Meyer, S C Mills, N Agudelo, V Ranwez, J T Boehm, and Ryuji  
855 J. Machida. 2013. 'A New Versatile Primer Set Targeting a Short Fragment of the  
856 Mitochondrial COI Region for Metabarcoding Metazoan Diversity: Application for  
857 Characterizing Coral Reef Fish Gut Contents'. *Front Zool* 10: 34.  
858 <https://doi.org/10.1186/1742-9994-10-34>.
- 859 Macheriotou, Lara, Katja Guilini, Tania Nara Bezerra, Bjorn Tytgat, Dinh Tu Nguyen, Thi Xuan  
860 Phuong Nguyen, Febe Noppe, et al. 2019. 'Metabarcoding Free-Living Marine Nematodes  
861 Using Curated 18S and COI Reference Sequence Databases for Species-Level Taxonomic  
862 Assignments'. *Ecology and Evolution* 9 (1): 1–16. <https://doi.org/10.1002/ece3.4814>.
- 863 Machida, Ryuji J., and Nancy Knowlton. 2012. 'PCR Primers for Metazoan Nuclear 18S and 28S  
864 Ribosomal DNA Sequences'. Edited by Jack Anthony Gilbert. *PLoS ONE* 7 (9): e46180.  
865 <https://doi.org/10.1371/journal.pone.0046180>.
- 866 Machida, Ryuji J., Matthew Kweskin, and Nancy Knowlton. 2012. 'PCR Primers for Metazoan

- 867 Mitochondrial 12S Ribosomal DNA Sequences'. *PLoS ONE* 7 (4).  
868 <https://doi.org/10.1371/journal.pone.0035887>.
- 869 Machida, Ryuji J., Matthieu Leray, Shian Lei Ho, and Nancy Knowlton. 2017. 'Data Descriptor:  
870 Metazoan Mitochondrial Gene Sequence Reference Datasets for Taxonomic Assignment of  
871 Environmental Samples'. *Scientific Data* 4. <https://doi.org/10.1038/sdata.2017.27>.
- 872 Mahe, F, Torbjørn Rognes, C Quince, Colomban De Vargas, and M Dunthorn. 2015. 'Swarm v2:  
873 Highly-Scalable and High-Resolution Amplicon Clustering'. *PeerJ* 3. <https://doi.org/Artn>  
874 [E142010.7717/Peerj.1420](https://doi.org/10.7717/Peerj.1420).
- 875 Massana, Ramón Ramon, Angélique Gobet, Stéphane Audic, David Bass, Lucie Bittner,  
876 Christophe Boutte, Aurélie Chambouvet, et al. 2015. 'Marine Protist Diversity in European  
877 Coastal Waters and Sediments as Revealed by High-Throughput Sequencing'.  
878 *Environmental Microbiology* 17 (10): 4035–49. <https://doi.org/10.1111/1462-2920.12955>.
- 879 Mayr, Ernst. 1942. *Systematics and the Origin of Species, from the Viewpoint of a Zoologist*.  
880 New York, NY: Columbia University Press.  
881 <http://www.hup.harvard.edu/catalog.php?isbn=9780674862500>.
- 882 McMurdie, Paul J., and Susan Holmes. 2013. 'Phyloseq: An R Package for Reproducible  
883 Interactive Analysis and Graphics of Microbiome Census Data'. Edited by Michael Watson.  
884 *PLoS ONE* 8 (4): e61217. <https://doi.org/10.1371/journal.pone.0061217>.
- 885 Minoche, André E, Juliane C Dohm, and Heinz Himmelbauer. 2011. 'Evaluation of Genomic  
886 High-Throughput Sequencing Data Generated on Illumina HiSeq and Genome Analyzer  
887 Systems'. *Genome Biology* 12 (11): R112. <https://doi.org/10.1186/gb-2011-12-11-r112>.
- 888 Nearing, Jacob T., Gavin M. Douglas, André M. Comeau, and Morgan G.I. Langille. 2018.  
889 'Denoising the Denoisers: An Independent Evaluation of Microbiome Sequence Error-  
890 Correction Approaches'. *PeerJ* 6: e5364. <https://doi.org/10.7717/peerj.5364>.

- 891 Nichols, Ruth V., Christopher Vollmers, Lee A. Newsom, Yue Wang, Peter D. Heintzman,  
892 McKenna Leighton, Richard E. Green, and Beth Shapiro. 2018. 'Minimizing Polymerase  
893 Biases in Metabarcoding'. *Molecular Ecology Resources* 18 (5): 927–39.  
894 <https://doi.org/10.1111/1755-0998.12895>.
- 895 Oksanen, Jari, Michael Blanchet, Guillaume F. Friendly, Roeland Kindt, Pierre Legendre, Dan  
896 McGlinn, R. Peter Minchin, R.B. O'Hara, et al. 2018. 'Vegan: Community Ecology  
897 Package'. <https://cran.r-project.org/package=vegan>.
- 898 Pansu, Johan, Charline Giguët-Covex, Francesco Ficetola, Ludovic Gielly, Frederic Boyer, Eric  
899 Coissac, Isabelle Domaizon, Lucie Zinger, Jerome Poulénard, and Fabien Arnaud. 2015.  
900 'Environmental DNA Metabarcoding to Investigate Historic Changes in Biodiversity'.  
901 *Genome* 58 (5): 264.
- 902 Parada, A E, D M Needham, and J A Fuhrman. 2016. 'Every Base Matters: Assessing Small  
903 Subunit rRNA Primers for Marine Microbiomes with Mock Communities, Time Series and  
904 Global Field Samples'. *Environ Microbiol* 18 (5): 1403–14. [https://doi.org/10.1111/1462-  
905 2920.13023](https://doi.org/10.1111/1462-2920.13023).
- 906 Pawlowski, Jan W., Richard Christen, Beatrice Lecroq, Dipankar Bachar, Hamid Reza  
907 Shahbazkia, Linda Amaral-Zettler, and Laure Guillou. 2011. 'Eukaryotic Richness in the  
908 Abyss: Insights from Pyrotag Sequencing'. *PLoS One* 6 (4).  
909 <https://doi.org/10.1371/journal.pone.0018169>.
- 910 Pei, Anna Y., William E Oberdorf, Carlos W Nossa, Ankush Agarwal, Pooja Chokshi, Erika A  
911 Gerz, Zhida Jin, et al. 2010. 'Diversity of 16S rRNA Genes within Individual Prokaryotic  
912 Genomes'. *Applied and Environmental Microbiology* 76 (12): 3886–97.  
913 <https://doi.org/10.1128/AEM.02953-09>.
- 914 Phillips, Jarrett D., Daniel J. Gillis, and Robert H. Hanner. 2019. 'Incomplete Estimates of

- 915 Genetic Diversity within Species: Implications for DNA Barcoding'. *Ecology and*  
916 *Evolution*. John Wiley & Sons, Ltd. <https://doi.org/10.1002/ece3.4757>.
- 917 Plouviez, S., T. M. Shank, B. Faure, C. Daguin-Thiebaut, F. Viard, F. H. Lallier, and D. Jollivet.  
918 2009. 'Comparative Phylogeography among Hydrothermal Vent Species along the East  
919 Pacific Rise Reveals Vicariant Processes and Population Expansion in the South'. *Molecular*  
920 *Ecology* 18 (18): 3903–17. <https://doi.org/10.1111/j.1365-294X.2009.04325.x>.
- 921 Quast, Christian, Elmar Pruesse, Pelin Yilmaz, Jan Gerken, Timmy Schweer, Pablo Yarza, Jörg  
922 Peplies, and Frank Oliver Glöckner. 2012. 'The SILVA Ribosomal RNA Gene Database  
923 Project: Improved Data Processing and Web-Based Tools'. *Nucleic Acids Research* 41 (D1):  
924 D590–96. <https://doi.org/10.1093/nar/gks1219>.
- 925 Queiroz, Kevin de. 2005. 'Ernst Mayr and the Modern Concept of Species'. *Proceedings of the*  
926 *National Academy of Sciences* 102 (Supplement 1): 6600–6607.  
927 <https://doi.org/10.1073/pnas.0502030102>.
- 928 R Core Team. 2018. 'R: A Language and Environment for Statistical Computing.' R Foundation  
929 for Statistical Computing, Vienna, Austria.
- 930 Salazar, Guillem, Francisco M Cornejo-Castillo, Veronica Benitez-Barrios, Eugenio Fraile-Nuez,  
931 X Anton Alvarez-Salgado, Carlos M Duarte, Josep M Gasol, and Silvia G Acinas. 2016.  
932 'Global Diversity and Biogeography of Deep-Sea Pelagic Prokaryotes'. *Isme Journal* 10 (3):  
933 596–608. <https://doi.org/10.1038/ismej.2015.137>.
- 934 Schloss, Patrick D., Sarah L. Westcott, Thomas Ryabin, Justine R. Hall, Martin Hartmann, Emily  
935 B. Hollister, Ryan A. Lesniewski, et al. 2009. 'Introducing Mothur: Open-Source, Platform-  
936 Independent, Community-Supported Software for Describing and Comparing Microbial  
937 Communities'. *Applied and Environmental Microbiology* 75 (23): 7537–41.  
938 <https://doi.org/10.1128/AEM.01541-09>.



- 939 Schnell, Ida Bærholm, Kristine Bohmann, and M. Thomas P. Gilbert. 2015. ‘Tag Jumps  
940 Illuminated - Reducing Sequence-to-Sample Misidentifications in Metabarcoding Studies’.  
941 *Molecular Ecology Resources* 15 (6): 1289–1303. <https://doi.org/10.1111/1755-0998.12402>.
- 942 Shank, Timothy M., Michael B. Black, Kenneth M. Halanych, Richard A. Lutz, and Robert C.  
943 Vrijenhoek. 1999. ‘Miocene Radiation of Deep-Sea Hydrothermal Vent Shrimp (Caridea:  
944 Bresiliidae): Evidence from Mitochondrial Cytochrome Oxidase Subunit I’. *Molecular*  
945 *Phylogenetics and Evolution* 13 (2): 244–54. <https://doi.org/10.1006/mpev.1999.0642>.
- 946 Shapiro, B. Jesse, Jean Baptiste Leducq, and James Mallet. 2016. ‘What Is Speciation?’ Edited  
947 by Ivan Matic. *PLoS Genetics* 12 (3): e1005860.  
948 <https://doi.org/10.1371/journal.pgen.1005860>.
- 949 Sinniger, Frederic, Jan W. Pawlowski, Saki Harii, Andrew J. Gooday, Hiroyuki Yamamoto,  
950 Pierre Chevaldonné, Tomas Cedhagen, Gary Carvalho, and Simon Creer. 2016. ‘Worldwide  
951 Analysis of Sedimentary DNA Reveals Major Gaps in Taxonomic Knowledge of Deep-Sea  
952 Benthos’. *Frontiers in Marine Science* 3 (June): 92.  
953 <https://doi.org/10.3389/FMARS.2016.00092>.
- 954 Slon, Viviane, Charlotte Hopfe, Clemens L Weiß, Fabrizio Mafessoni, Marco De La Rasilla,  
955 Carles Lalueza-Fox, Antonio Rosas, et al. 2017. ‘Neandertal and Denisovan DNA from  
956 Pleistocene Sediments’. *Science* 356 (6338): 605–8.  
957 <https://doi.org/10.1126/science.aam9695>.
- 958 Sokal, Robert R., and Theodore J. Crovello. 1970. ‘The Biological Species Concept : A Critical  
959 Evaluation’. *The American Naturalist* 104 (936): 127–53.
- 960 Song, Hojun, Jennifer E Buhay, Michael F Whiting, and Keith A Crandall. 2008. ‘Many Species  
961 in One: DNA Barcoding Overestimates the Number of Species When Nuclear  
962 Mitochondrial Pseudogenes Are Coamplified’. *Proceedings of the National Academy of*



- 963 *Sciences of the United States of America* 105 (36): 13486–91.
- 964 <https://doi.org/10.1073/pnas.0803076105>.
- 965 Stat, Michael, Megan J. Huggett, Rachele Bernasconi, Joseph D. Dibattista, Tina E. Berry,  
966 Stephen J. Newman, Euan S. Harvey, and Michael Bunce. 2017. ‘Ecosystem Biomonitoring  
967 with EDNA: Metabarcoding across the Tree of Life in a Tropical Marine Environment’.  
968 *Scientific Reports* 7. <https://doi.org/10.1038/s41598-017-12501-5>.
- 969 Stefanni, Sergio, David Stanković, Diego Borme, Alessandra de Olazabal, Tea Juretić, Alberto  
970 Pallavicini, and Valentina Tirelli. 2018. ‘Multi-Marker Metabarcoding Approach to Study  
971 Mesozooplankton at Basin Scale’. *Scientific Reports* 8 (1): 12085.  
972 <https://doi.org/10.1038/s41598-018-30157-7>.
- 973 Taberlet, Pierre, Eric Coissac, Mehrdad Hajibabaei, and Loren H. Rieseberg. 2012.  
974 ‘Environmental DNA’. *Molecular Ecology* 21 (8): 1789–93. [https://doi.org/10.1111/j.1365-](https://doi.org/10.1111/j.1365-294X.2012.05542.x)  
975 [294X.2012.05542.x](https://doi.org/10.1111/j.1365-294X.2012.05542.x).
- 976 Tang, Cuong Q., Francesca Leasi, Ulrike Obertegger, Alexander Kieneke, Timothy G  
977 Barraclough, and Diego Fontaneto. 2012. ‘The Widely Used Small Subunit 18S rDNA  
978 Molecule Greatly Underestimates True Diversity in Biodiversity Surveys of the Meiofauna.’  
979 *Proceedings of the National Academy of Sciences of the United States of America* 109 (40):  
980 16208–12. <https://doi.org/10.1073/pnas.1209160109>.
- 981 Teixeira, Sara, Karine Olu, Carole Decker, Regina L Cunha, Sandra Fuchs, Stéphane Hourdez,  
982 Ester A. Serrão, and Sophie Arnaud-Haond. 2013. ‘High Connectivity across the  
983 Fragmented Chemosynthetic Ecosystems of the Deep Atlantic Equatorial Belt: Efficient  
984 Dispersal Mechanisms or Questionable Endemism?’ *Molecular Ecology* 22 (18): 4663–80.  
985 <https://doi.org/10.1111/mec.12419>.
- 986 Valentini, Alice, François Pompanon, and Pierre Taberlet. 2009. ‘DNA Barcoding for

- 987 Ecologists'. *Trends in Ecology and Evolution*. Elsevier Current Trends.
- 988 <https://doi.org/10.1016/j.tree.2008.09.011>.
- 989 Valentini, Alice, Pierre Taberlet, Claude Miaud, Raphaël Raphael Civade, Jelger Herder, Philip  
990 Francis Thomsen, Eva Bellemain, et al. 2016. 'Next-Generation Monitoring of Aquatic  
991 Biodiversity Using Environmental DNA Metabarcoding'. *Molecular Ecology* 25 (4): 929–  
992 42. <https://doi.org/10.1111/mec.13428>.
- 993 Vargas, Colombar De, Stéphane Audic, Nicolas Henry, Johan Decelle, Frédéric Mahé, Ramiro  
994 Logares, Enrique Lara, et al. 2015. 'Eukaryotic Plankton Diversity in the Sunlit Ocean'.  
995 *Science* 348 (6237). <https://doi.org/10.1126/science.1261605>.
- 996 Wangensteen, Owen S., and Xavier Turon. 2016. 'Metabarcoding Techniques for Assessing  
997 Biodiversity of Marine Animal Forests'. In *Marine Animal Forests*, edited by S. Rossi, L.  
998 Bramanti, A. Gori, and C. Orejas Saco del Valle, 1–29. Cham: Springer International  
999 Publishing. [https://doi.org/10.1007/978-3-319-17001-5\\_53-1](https://doi.org/10.1007/978-3-319-17001-5_53-1).
- 1000 Xiong, Wei, and Aibin Zhan. 2018. 'Testing Clustering Strategies for Metabarcoding-Based  
1001 Investigation of Community–Environment Interactions'. *Molecular Ecology Resources* 18  
1002 (6): 1326–38. <https://doi.org/10.1111/1755-0998.12922>.
- 1003 Yoccoz, N G, K A Brathen, L Gielly, J Haile, M E Edwards, T Goslar, H von Stedingk, et al.  
1004 2012. 'DNA from Soil Mirrors Plant Taxonomic and Growth Form Diversity'. *Molecular*  
1005 *Ecology* 21 (15): 3647–55. <https://doi.org/10.1111/j.1365-294X.2012.05545.x>.
- 1006 Yu, Douglas W, Yinqiu Ji, Brent C Emerson, Xiaoyang Wang, Chengxi Ye, Chunyan Yang, and  
1007 Zhaoli Ding. 2012. 'Biodiversity Soup: Metabarcoding of Arthropods for Rapid Biodiversity  
1008 Assessment and Biomonitoring'. *Methods in Ecology and Evolution* 3 (4): 613–23.  
1009 <https://doi.org/10.1111/j.2041-210X.2012.00198.x>.
- 1010 Zanol, Joana, Kenneth M. Halanych, Torsten H. Struck, and Kristian Fauchald. 2010. 'Phylogeny

1011 of the Bristle Worm Family Eunicidae (Eunicida, Annelida) and the Phylogenetic Utility of  
1012 Noncongruent 16S, COI and 18S in Combined Analyses'. *Molecular Phylogenetics and*  
1013 *Evolution* 55 (2): 660–76. <https://doi.org/10.1016/j.ympev.2009.12.024>.

1014 Zhan, Aibin, Sarah A. Bailey, Daniel D. Heath, and Hugh J. Macisaac. 2014. 'Performance  
1015 Comparison of Genetic Markers for High-Throughput Sequencing-Based Biodiversity  
1016 Assessment in Complex Communities'. *Molecular Ecology Resources* 14 (5): 1049–59.  
1017 <https://doi.org/10.1111/1755-0998.12254>.

1018 Zinger, Lucie, Jérôme Chave, Eric Coissac, Amaia Iribar, Eliane Louisanna, Sophie Manzi,  
1019 Vincent Schilling, Heidy Schimann, Guilhem Sommeria-Klein, and Pierre Taberlet. 2016.  
1020 'Extracellular DNA Extraction Is a Fast, Cheap and Reliable Alternative for Multi-Taxa  
1021 Surveys Based on Soil DNA'. *Soil Biology and Biochemistry* 96: 16–19.  
1022 <https://doi.org/10.1016/j.soilbio.2016.01.008>.

1023

## 1024 **DATA ACCESSIBILITY**

1025 The data for this work can be accessed in the European Nucleotide Archive (ENA)  
1026 database (Study accession number will be given upon manuscript acceptance). The data set,  
1027 including sequences, databases, as well as raw and refined ASV/OTU tables, has been deposited  
1028 on <ftp://ftp.ifremer.fr/ifremer/dataref/bioinfo/merlin/abyss/BioinformaticPipelineComparisons/>.  
1029 Bioinformatic scripts, config files, and R scripts are available on Gitlab  
1030 (<https://gitlab.ifremer.fr/abyss-project/>).

1031 **AUTHOR CONTRIBUTIONS**

1032 MIB and SAH designed the study, MIB and JP carried out the laboratory and molecular  
1033 work; MIB and BT performed the bioinformatic and statistical analyses. LQ assisted in the  
1034 bioinformatic development and participated in the study design. MIB and SAH wrote the  
1035 manuscript. All authors contributed to the final manuscript.
